# Supplementary material for: Potential of Vitamin B6 Dioxime Analogues to Act as Cholinesterase Ligands
Source: MDPI journal article supplement (doi:10.3390/ijms232113388), 2022-11-02
Supplement: s1 [file s1]

## SUPPLEMENTARY INFORMATION

# Potential of Vitamin B6 Dioxime Analogues to Act as Cholinesterase Ligands

Dajana Gašo Sokač<sup>1,†</sup>, Antonio Zandona<sup>2,†</sup>, Sunčica Roca<sup>3</sup>, Dražen Vikić-Topić<sup>3,4</sup>, Gabriela Lihtar<sup>2</sup>, Nikola Maraković<sup>2</sup>, Valentina Bušić<sup>1</sup>, Zrinka Kovarik<sup>2</sup> and Maja Katalinić<sup>2,\*</sup>

|                                                                                |    |
|--------------------------------------------------------------------------------|----|
| NMR spectra of prepared compounds (1 – 7).....                                 | 2  |
| MS spectra of prepared compounds (1 – 7).....                                  | 38 |
| Interactions between compound 1 and AChE, and compound 7 and AChE / BChE ..... | 45 |

# NMR spectra of prepared compounds (1 – 7)

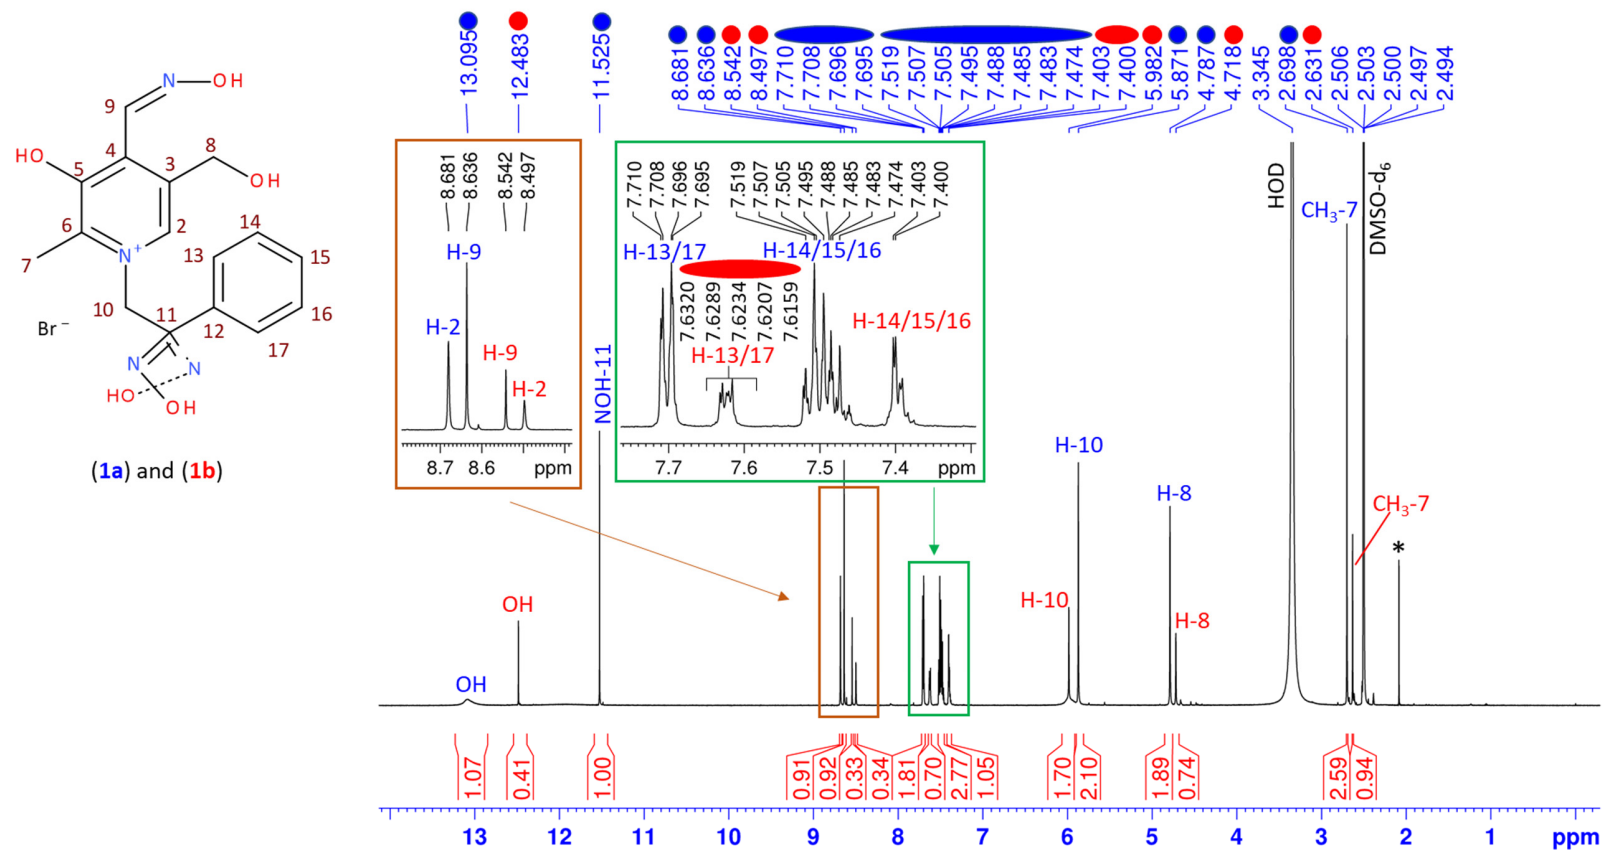

**Figure S1.** 600 MHz  $^1\text{H}$  NMR spectrum of the isomer mixture (a and b) of compound 1 in  $\text{DMSO-d}_6$ . Acetone left after synthesis is marked with an asterisk.

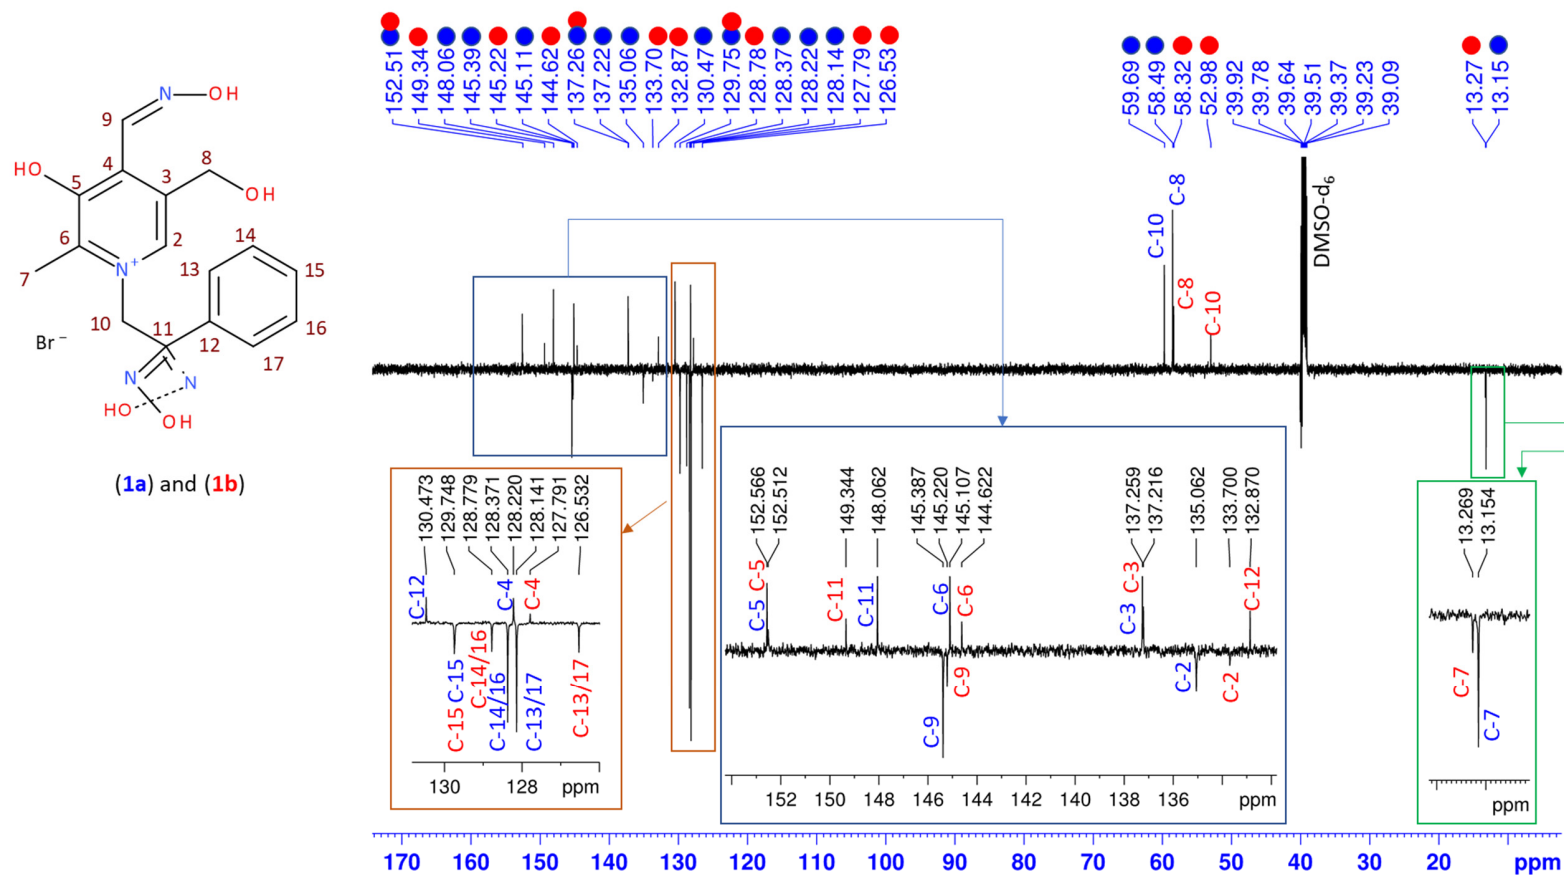

Figure S2. 150 MHz <sup>13</sup>C APT spectrum of the isomer mixture (a and b) of compound 1 in DMSO-d<sub>6</sub>.

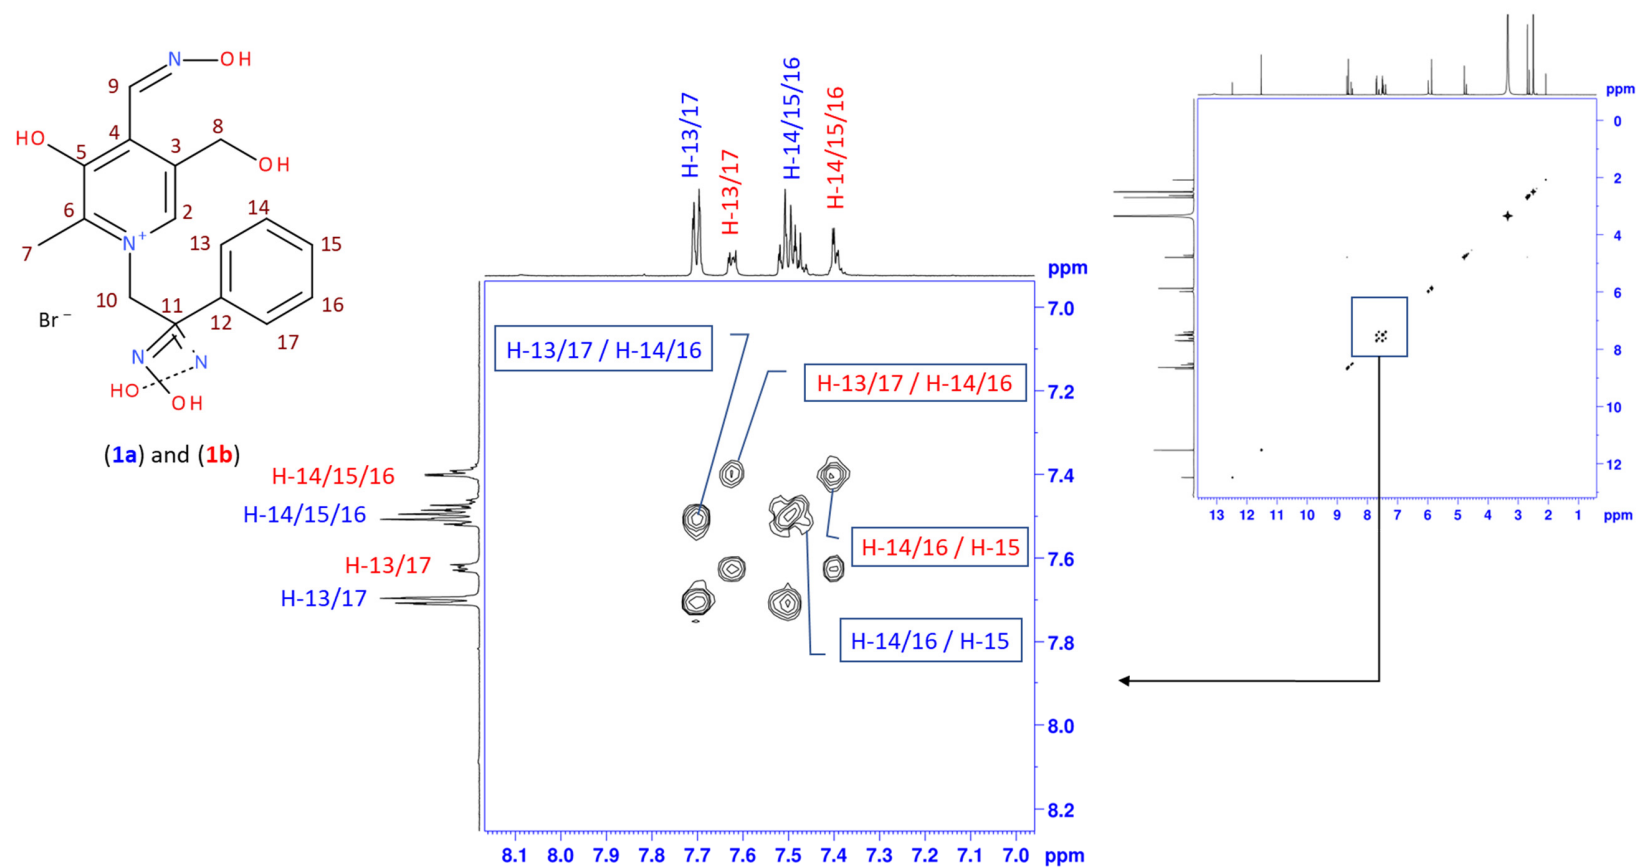

**Figure S3.** 600 MHz <sup>1</sup>H, <sup>1</sup>H-COSY NMR spectrum of the isomer mixture (a and b) of compound **1** in DMSO-d<sub>6</sub>. The one-dimensional <sup>1</sup>H spectrum is shown at the top and on the left.



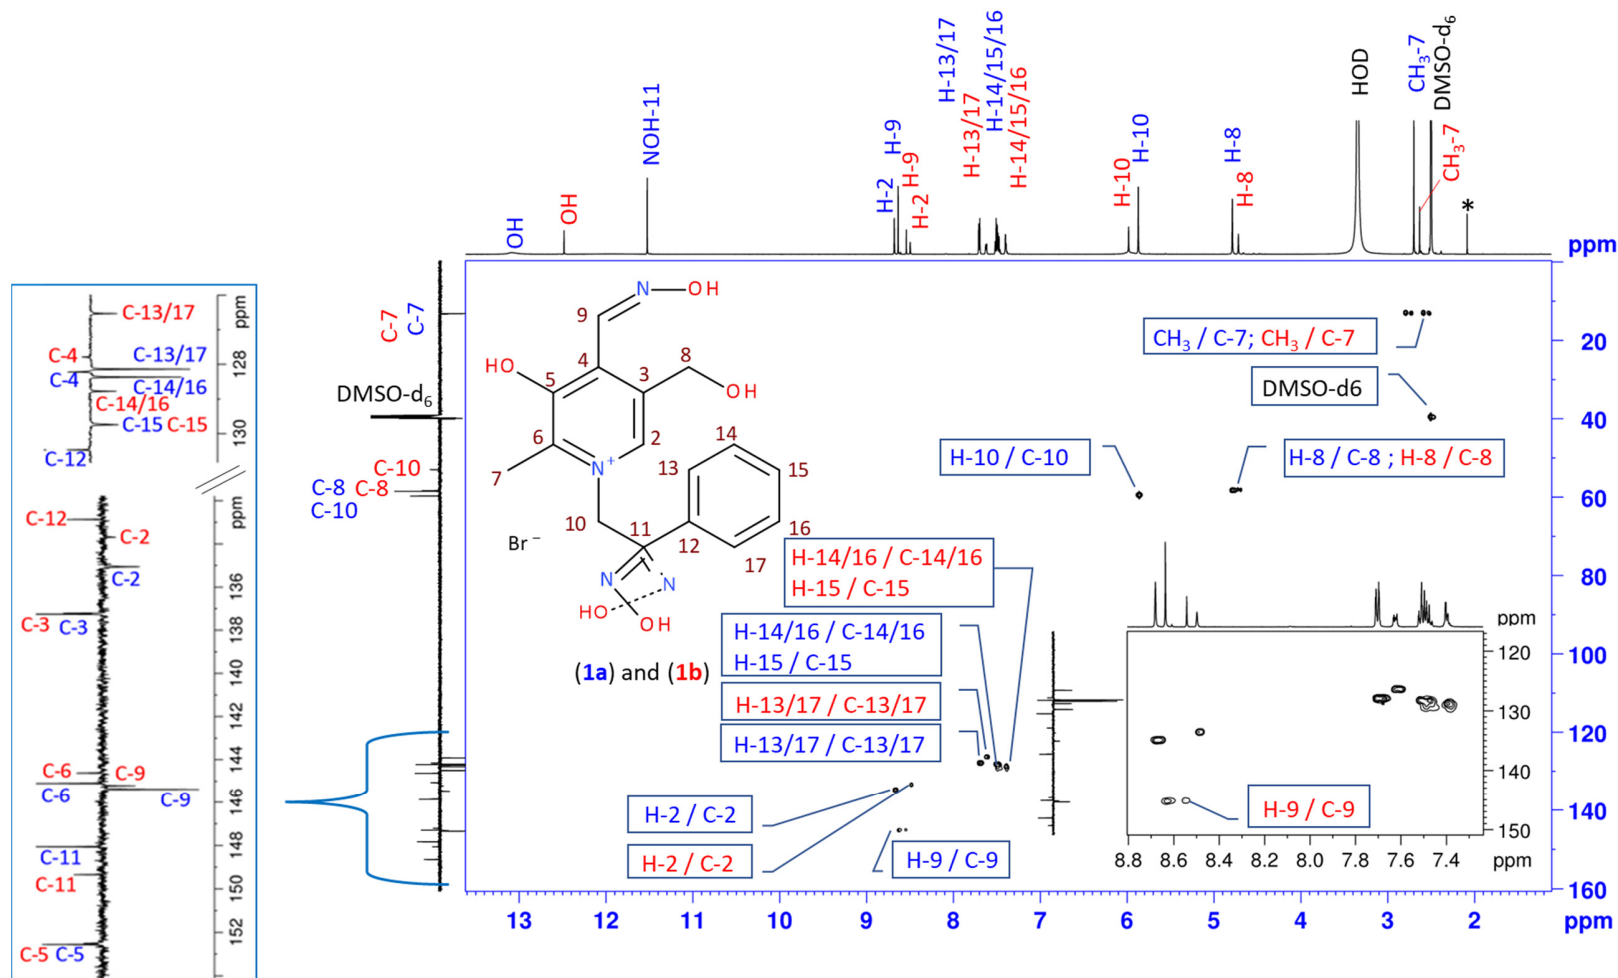

**Figure S4.** Two-dimensional H,C-correlated spectra of the isomer mixture (a and b) of compound **1** recorded by HMQC method in DMSO-d<sub>6</sub>. The 600 MHz <sup>1</sup>H spectrum is shown at the top and 125 MHz <sup>13</sup>C NMR spectrum at the left-hand edge.

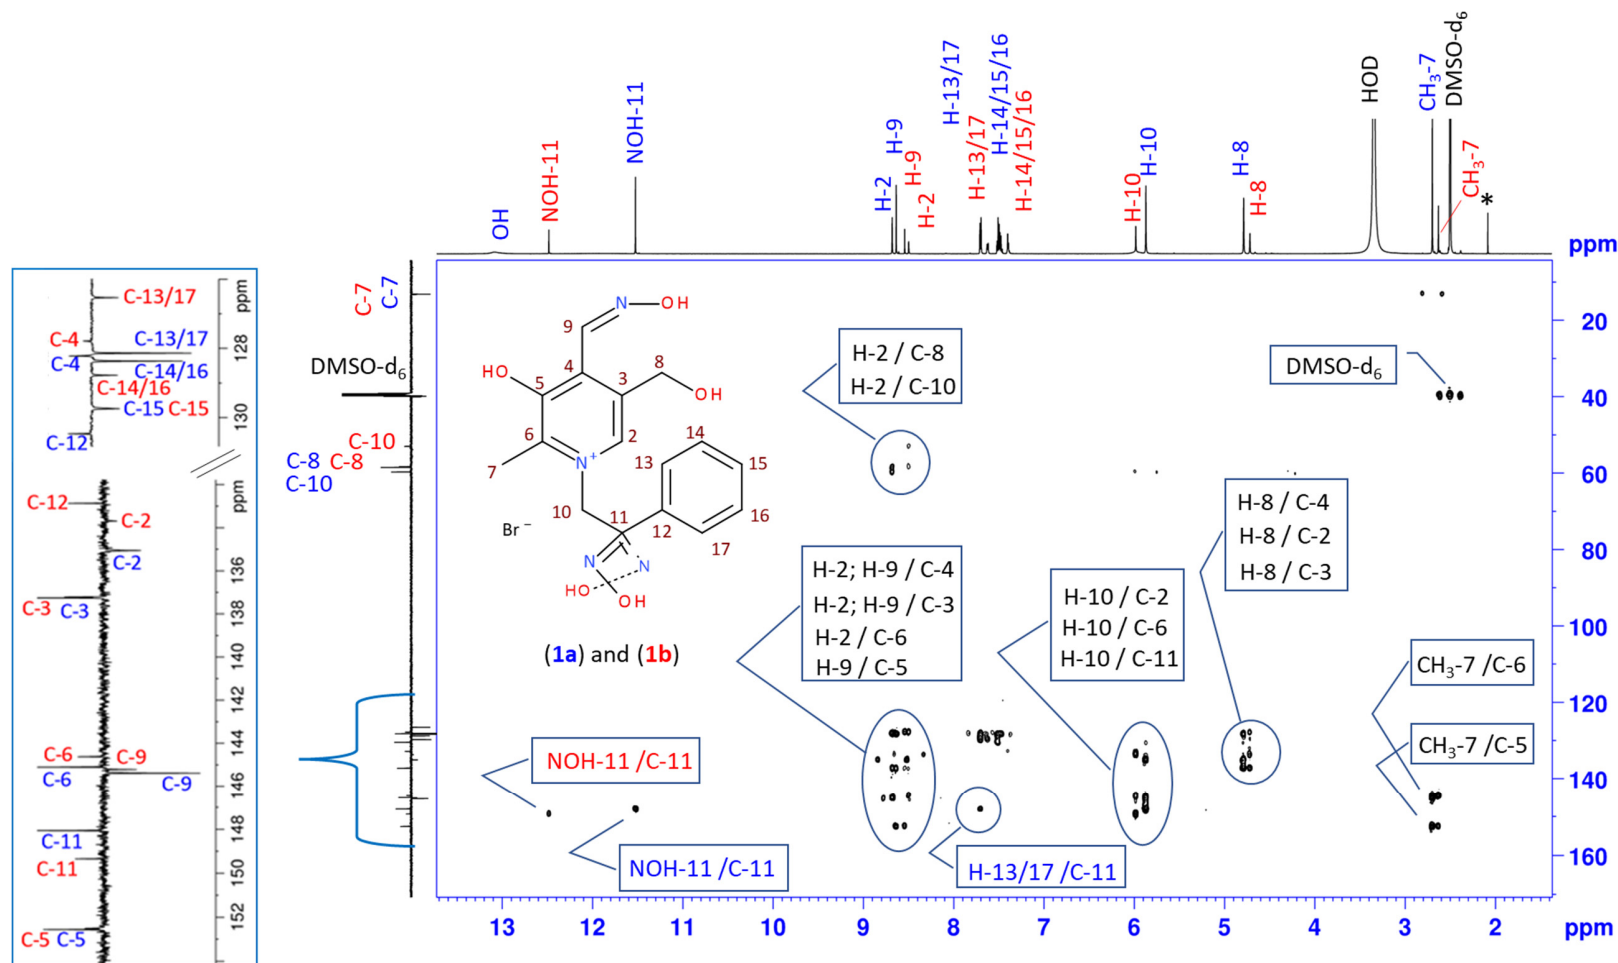

**Figure S5.** Two-dimensional  $^1\text{H}$ , $^{13}\text{C}$ -correlated spectra of the isomer mixture (a and b) of compound **1** recorded by HMBC method in  $\text{DMSO-d}_6$ . The 600 MHz  $^1\text{H}$  spectrum is shown at the top and 125 MHz  $^{13}\text{C}$  NMR spectrum at the left-hand edge. Correlation peaks found for both isomers are marked with black letters.



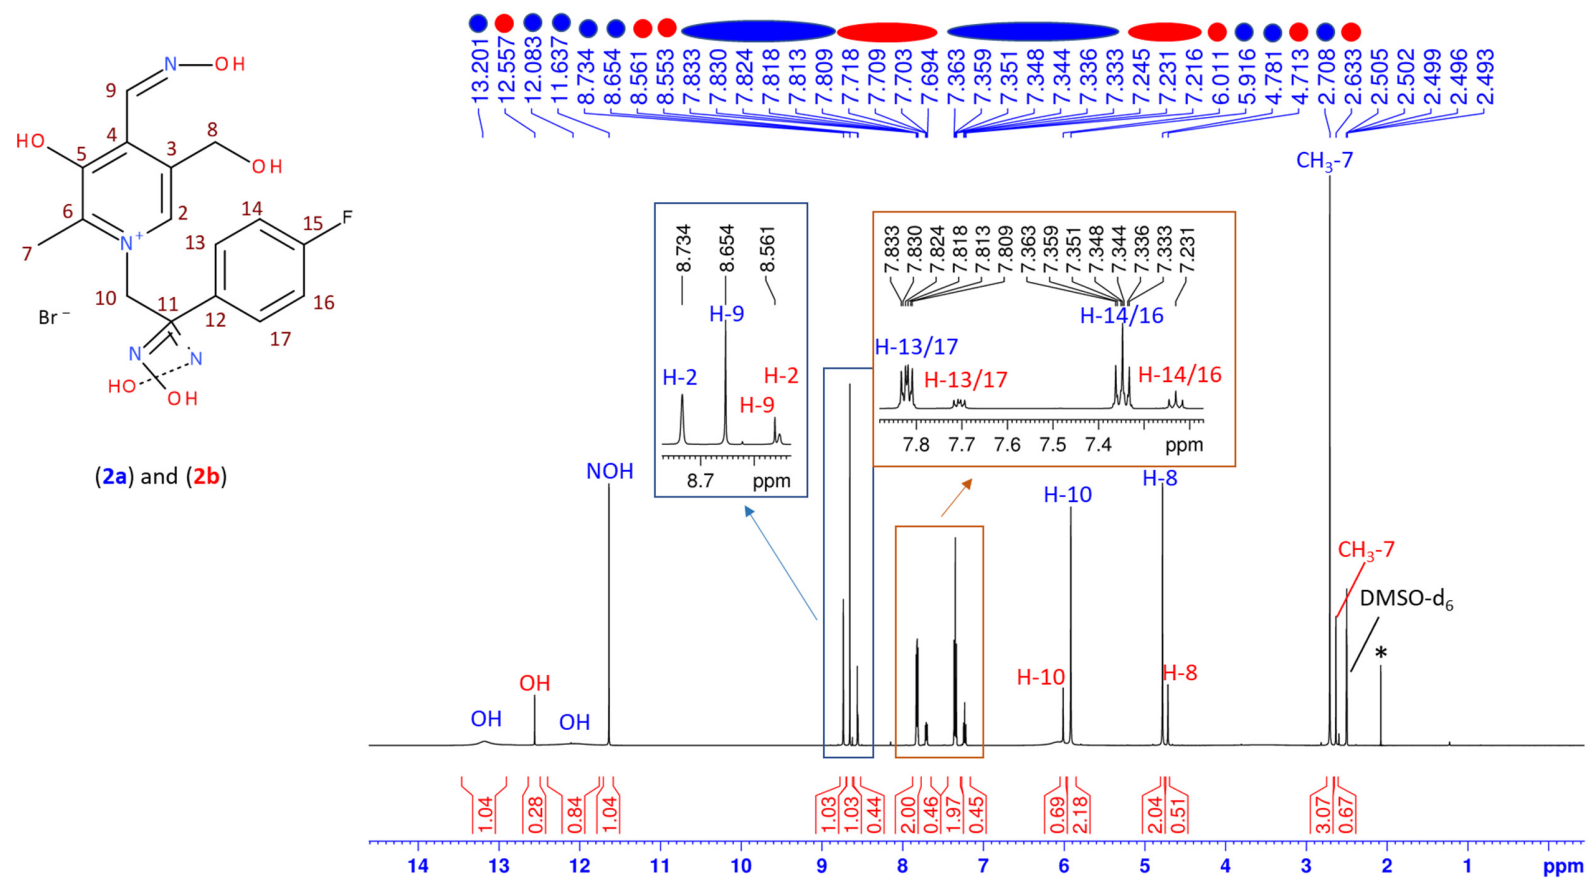

**Figure S7.** 600 MHz  $^1\text{H}$  NMR spectrum of the isomer mixture (a and b) of compound 2 in  $\text{DMSO-d}_6$ . Acetone left after synthesis is marked with an asterisk.

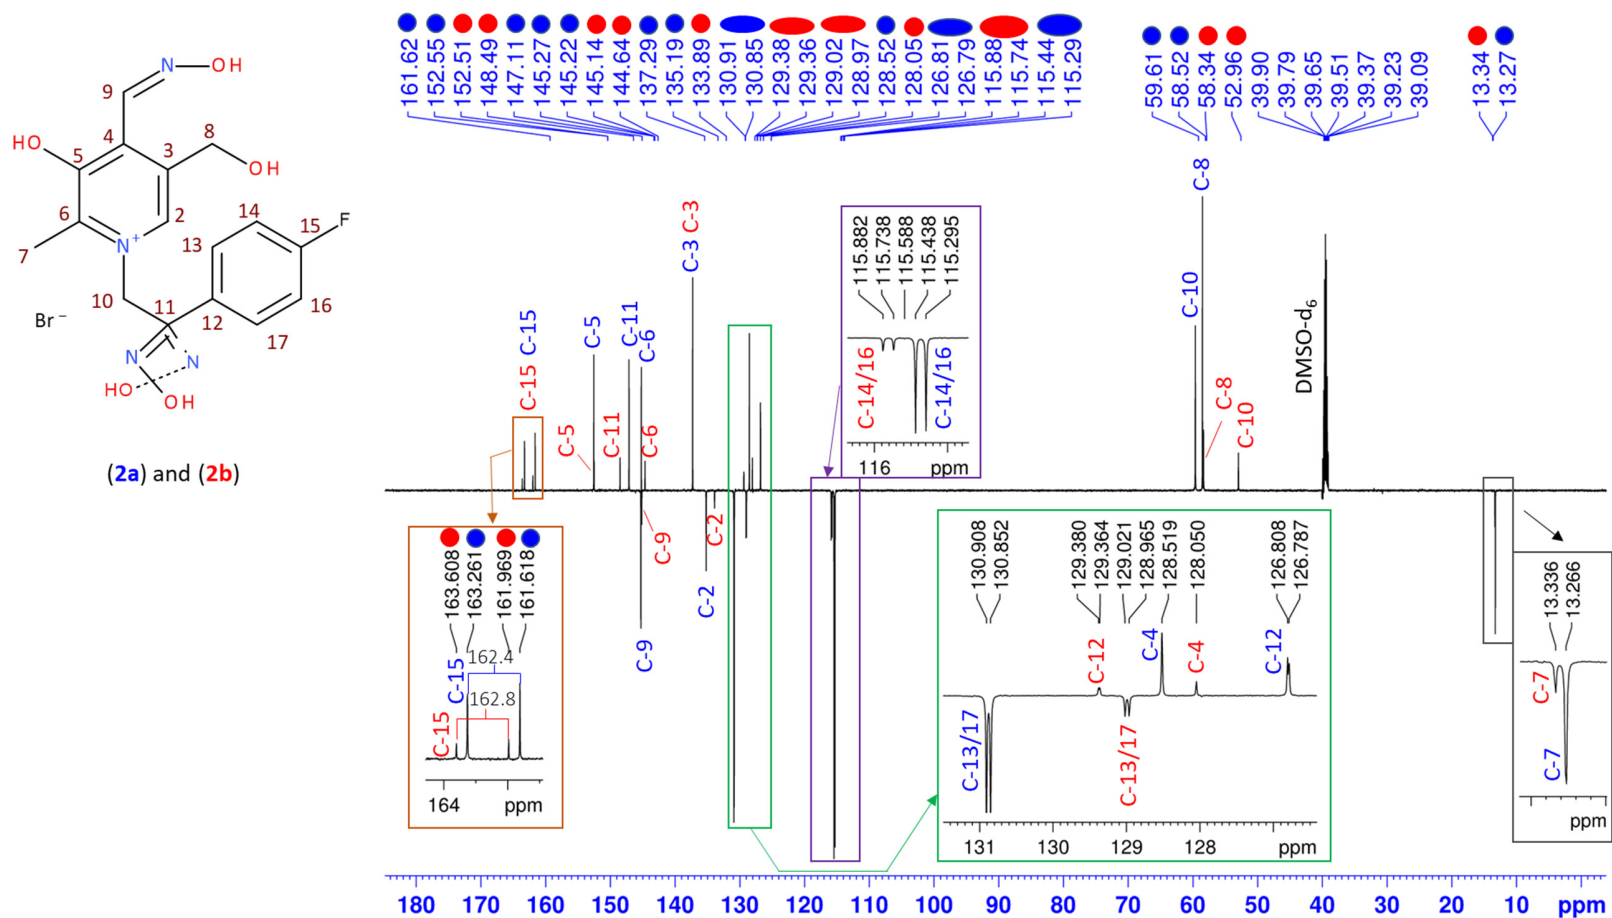

**Figure S8.** 150 MHz  $^{13}\text{C}$  APT spectrum of the isomer mixture (a and b) of compound 2 in DMSO- $\text{d}_6$ .

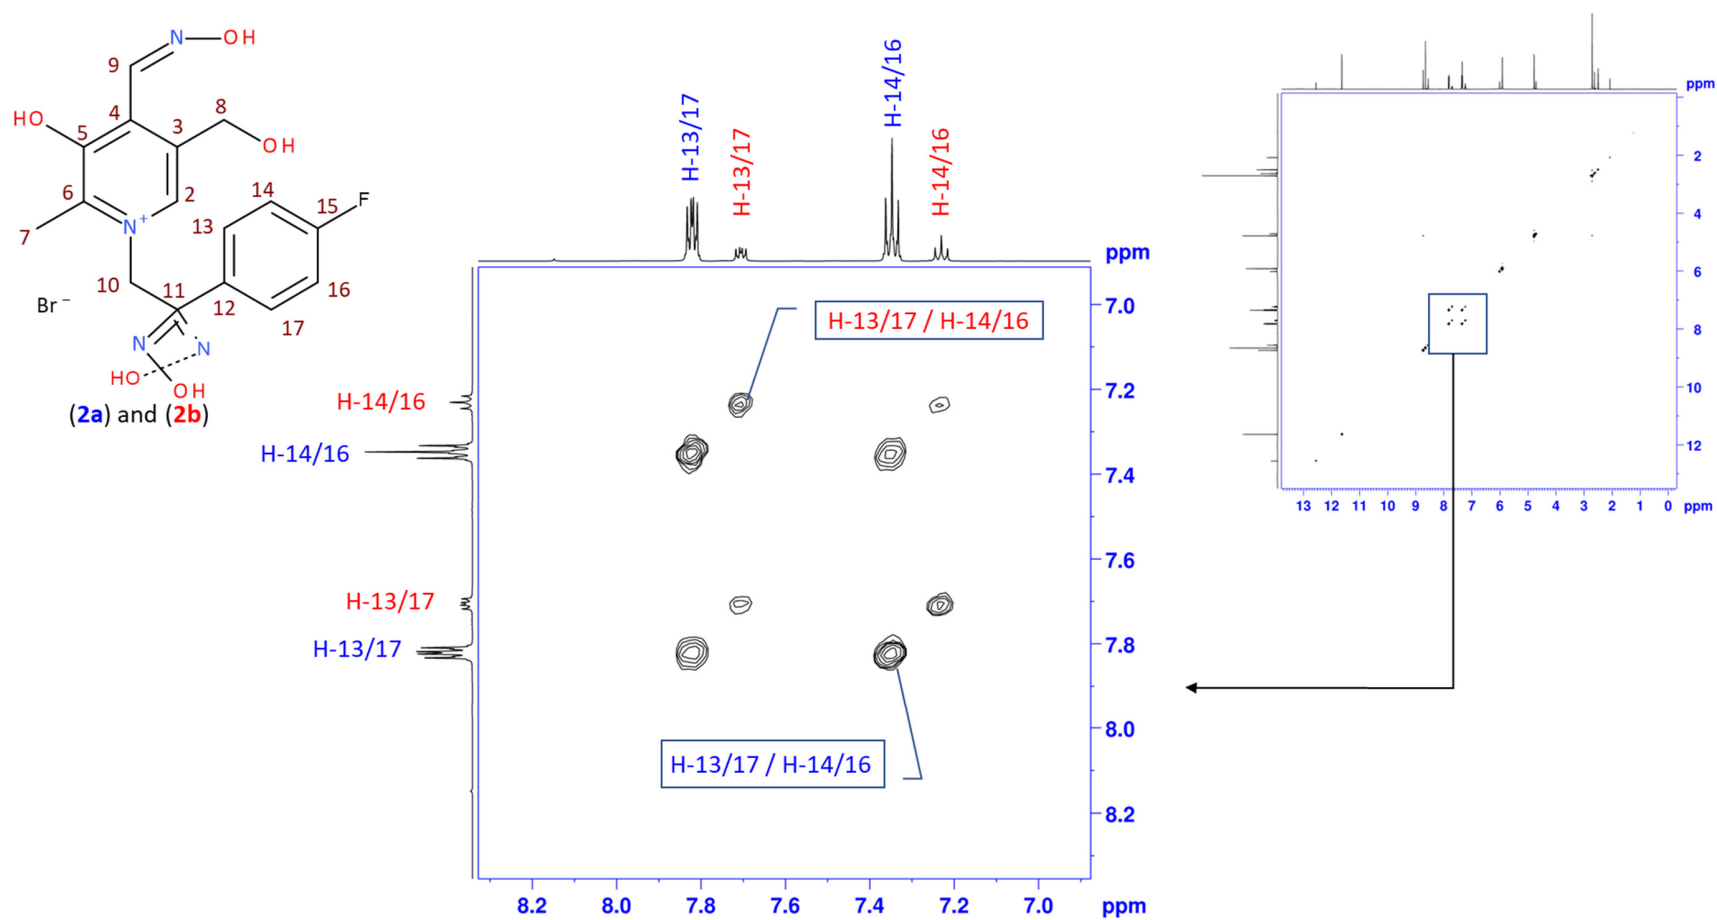

**Figure S9.** 600 MHz <sup>1</sup>H,<sup>1</sup>H-COSY NMR spectrum of the isomer mixture (a and b) of compound **2** in DMSO-d<sub>6</sub>. The one-dimensional <sup>1</sup>H spectrum is shown at the top and on the left.

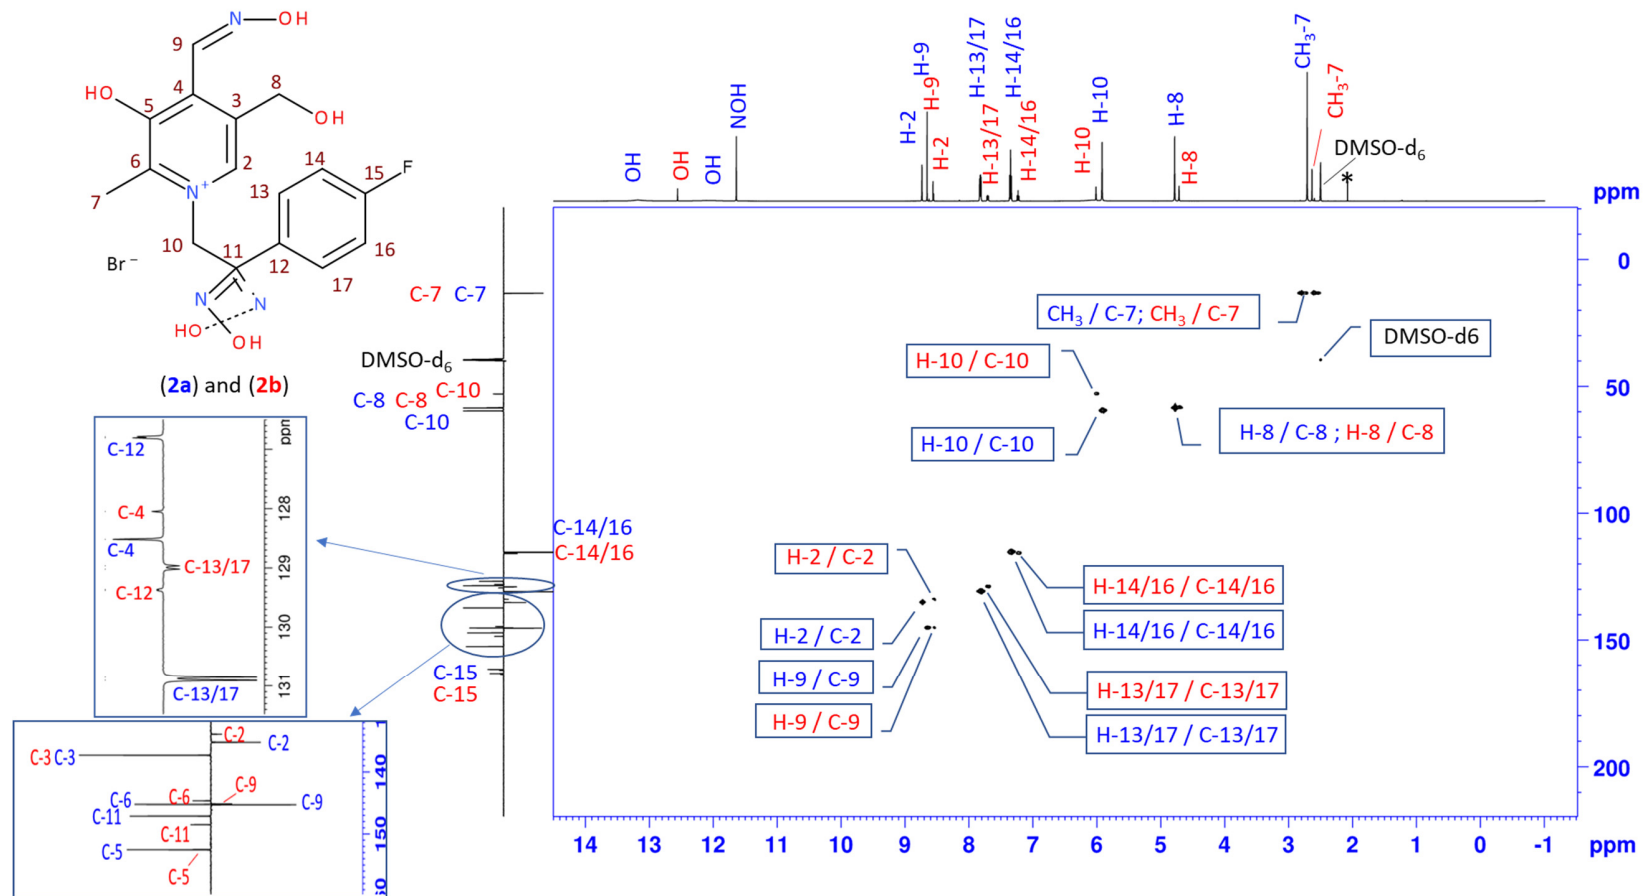

**Figure S10.** Two-dimensional  $^1\text{H}$ , $^{13}\text{C}$ -correlated spectra of the isomer mixture (a and b) of compound **2** recorded by HMQC method in  $\text{DMSO-d}_6$ . The 600 MHz  $^1\text{H}$  spectrum is shown at the top and 125 MHz  $^{13}\text{C}$  NMR spectrum at the left-hand edge.

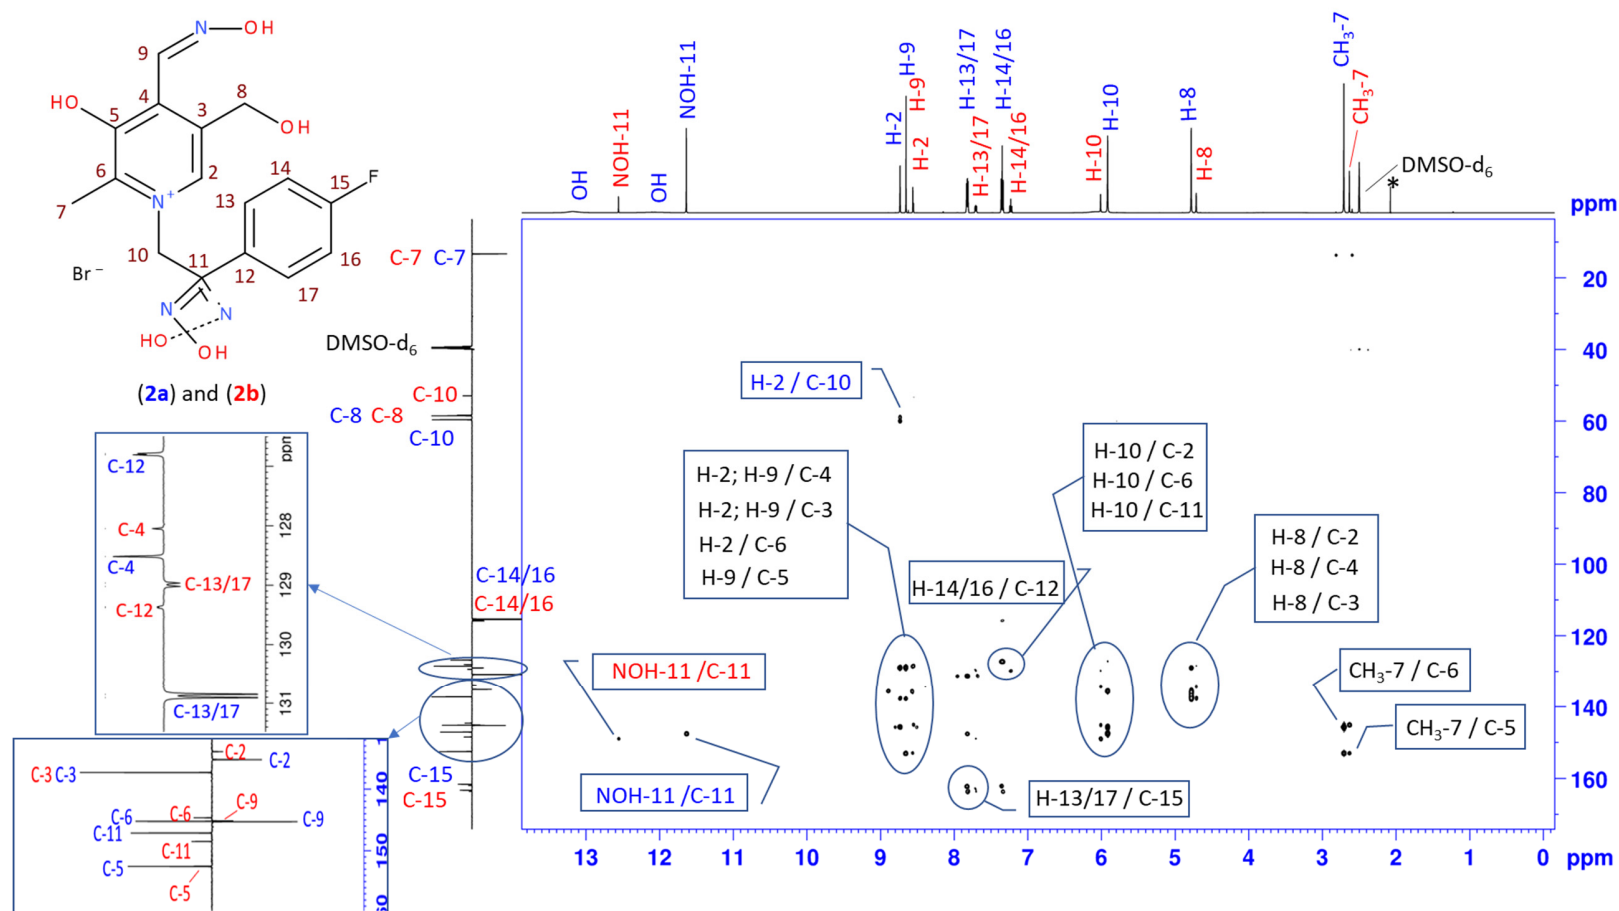

**Figure S11.** Two-dimensional H,C-correlated spectra of the isomer mixture (a and b) of compound **2** recorded by HMBC method in DMSO- $d_6$ . The 600 MHz  $^1\text{H}$  spectrum is shown at the top and 125 MHz  $^{13}\text{C}$  NMR spectrum at the left-hand edge. Correlation peaks found for both isomers are marked with black letters.



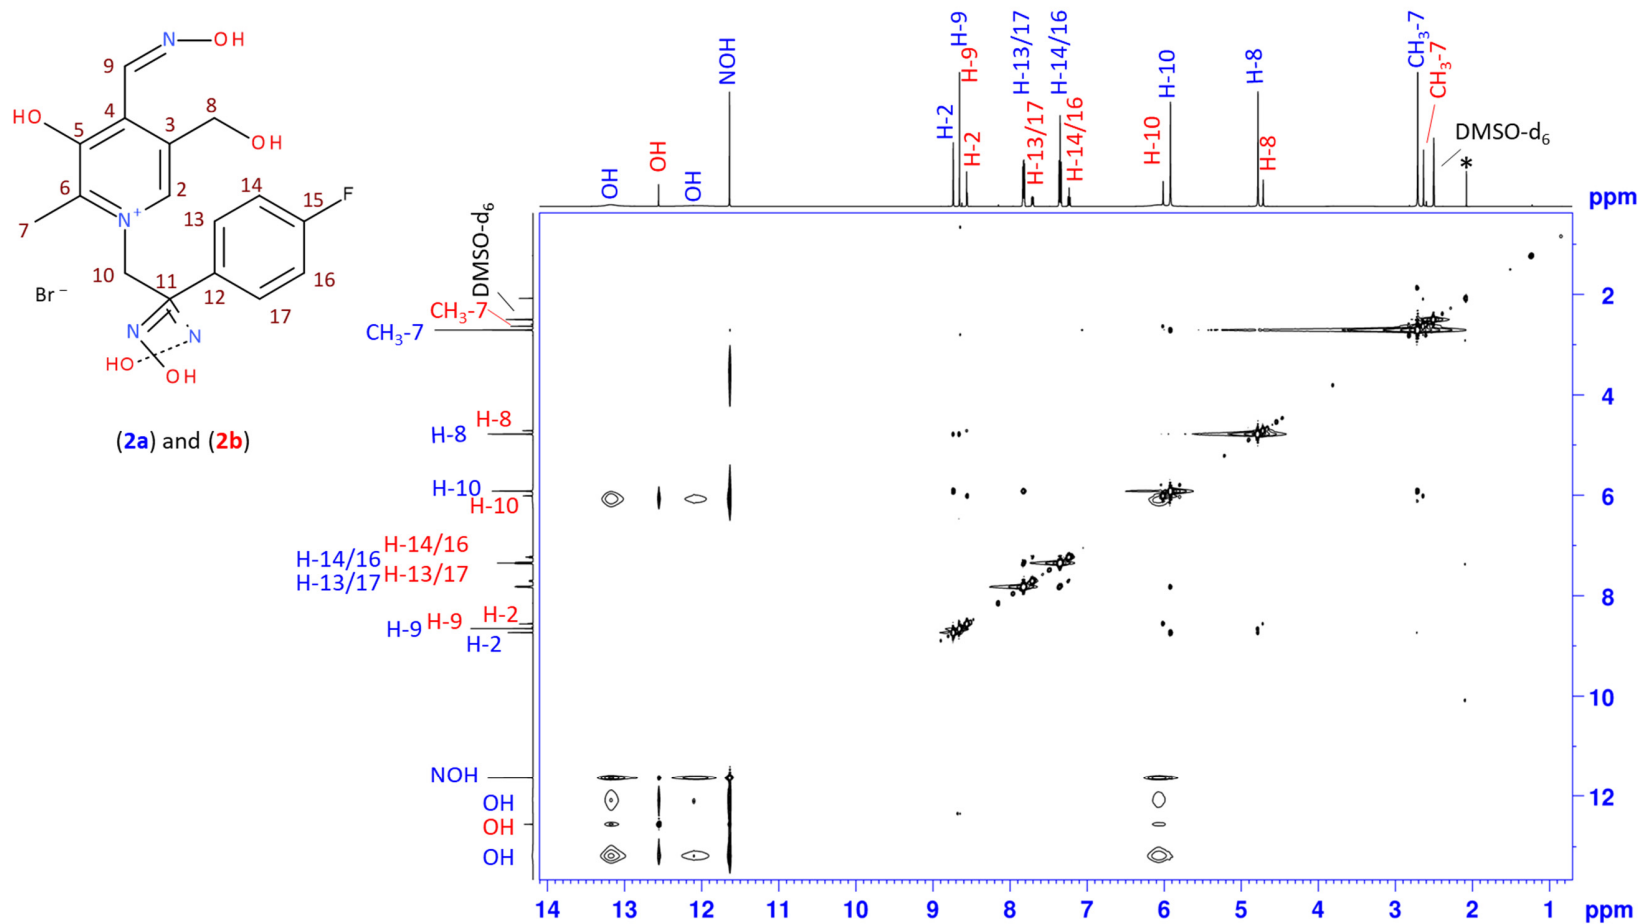

**Figure S12.** 600 MHz NOESY NMR spectrum of the isomer mixture (a and b) of compound **2** in  $\text{DMSO-d}_6$ . The one-dimensional  $^1\text{H}$  spectrum is shown at the top and on the left.

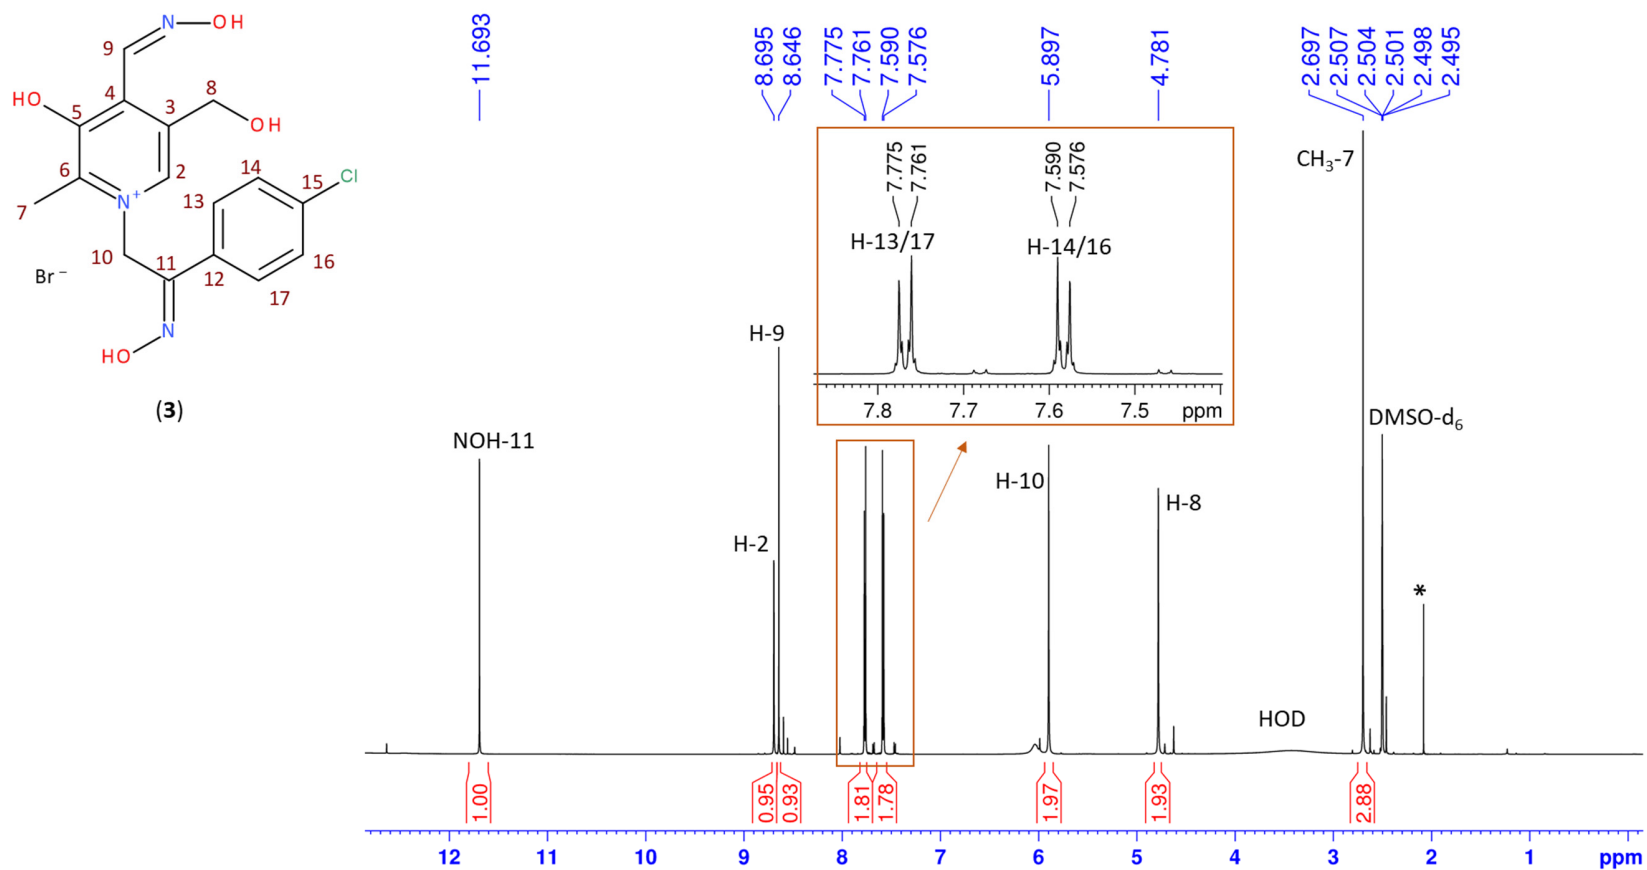

**Figure S13.** 600 MHz <sup>1</sup>H NMR spectrum of compound **3** in DMSO-d<sub>6</sub>. Acetone left after synthesis is marked with an asterisk.

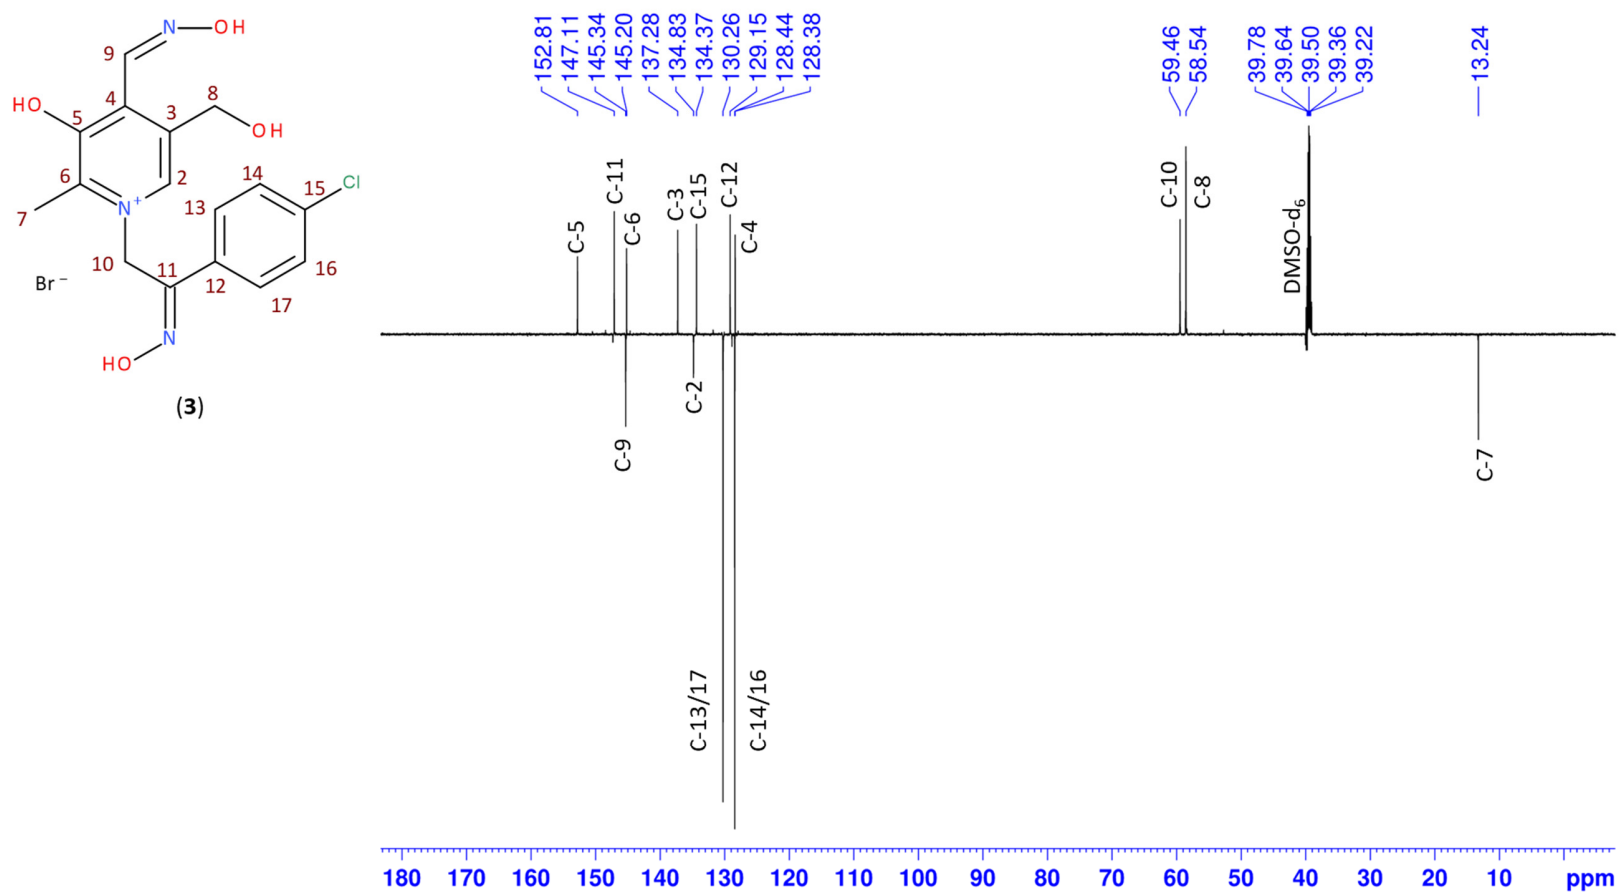

**Figure S14.** 150 MHz  $^{13}\text{C}$  APT spectrum of compound **3** in DMSO-d<sub>6</sub>.

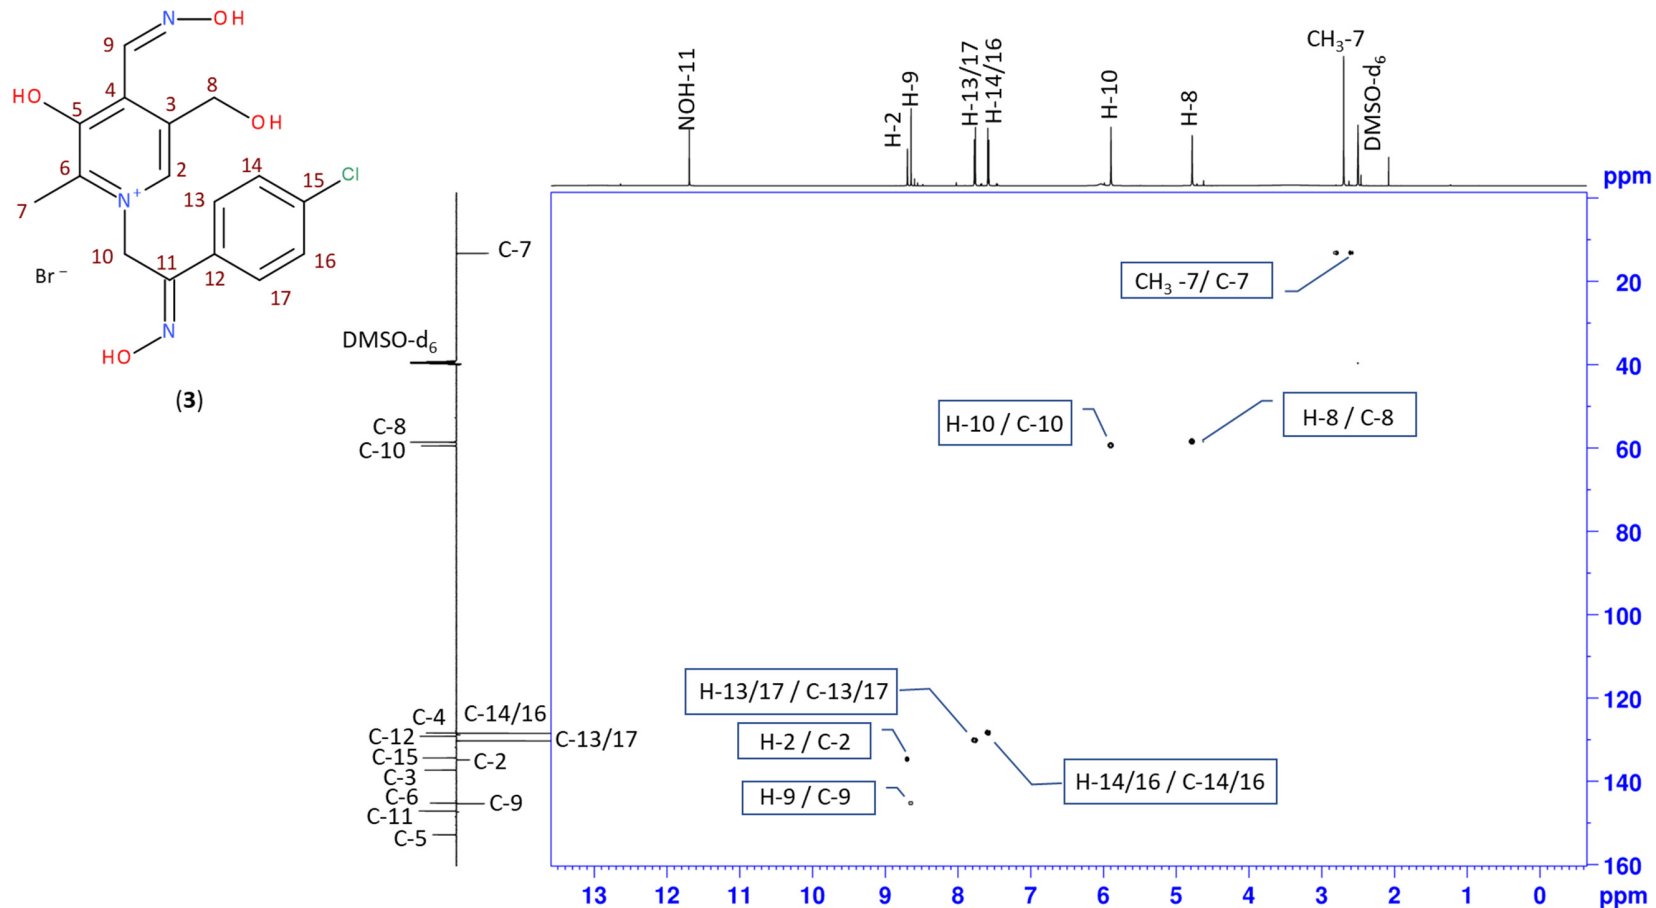

**Figure S15.** Two-dimensional H,C-correlated spectra of compound **3** recorded by HMQC method in DMSO-d<sub>6</sub>. The 600 MHz <sup>1</sup>H spectrum is shown at the top and 125 MHz <sup>13</sup>C NMR spectrum at the left-hand edge.



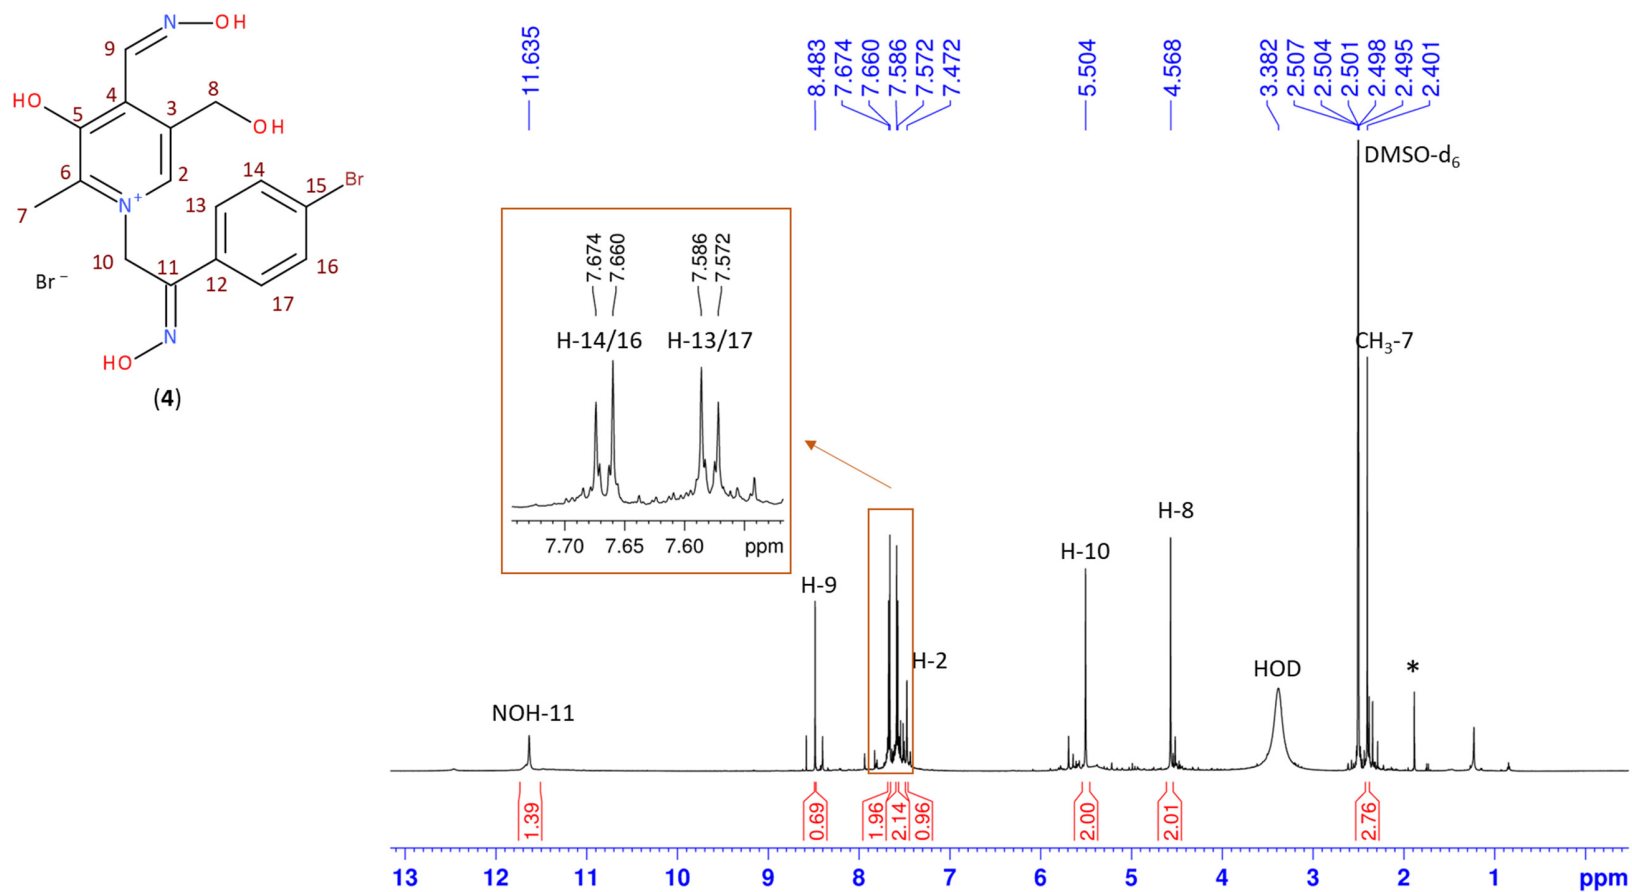

**Figure S17.** 600 MHz <sup>1</sup>H NMR spectrum of compound **4** in DMSO-d<sub>6</sub>. Acetone left after synthesis is marked with an asterisk.

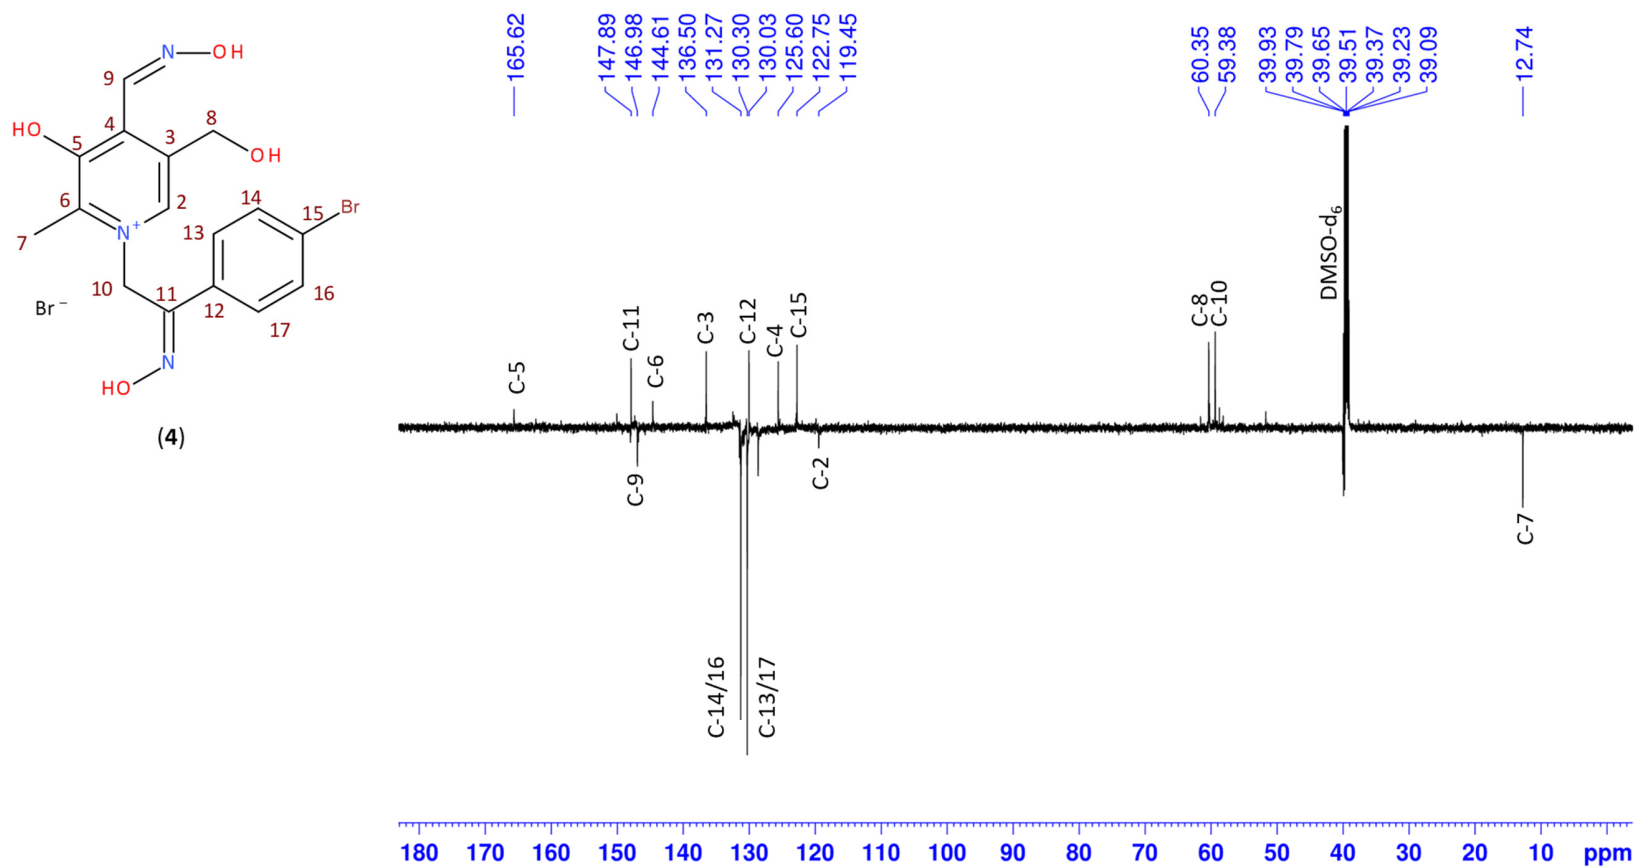

**Figure S18.** 150 MHz  $^{13}\text{C}$  APT spectrum of compound **4** in  $\text{DMSO-d}_6$ .

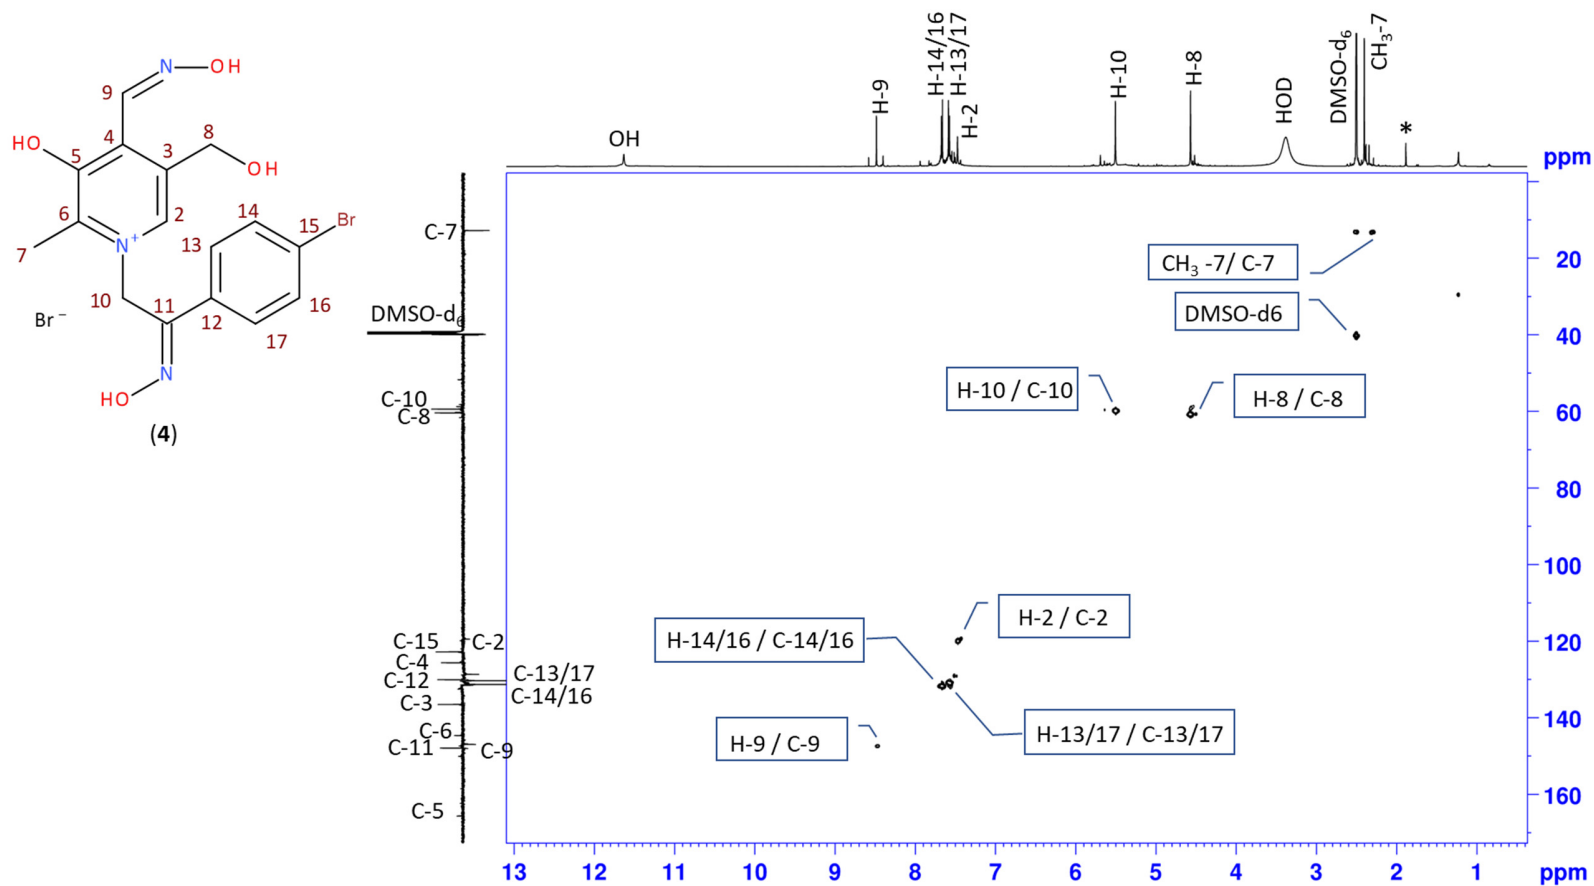

**Figure S19.** Two-dimensional H,C-correlated spectra of compound **4** recorded by HMQC method in DMSO- $\text{d}_6$ . The 600 MHz  $^1\text{H}$  spectrum is shown at the top and 125 MHz  $^{13}\text{C}$  NMR spectrum at the left-hand edge.



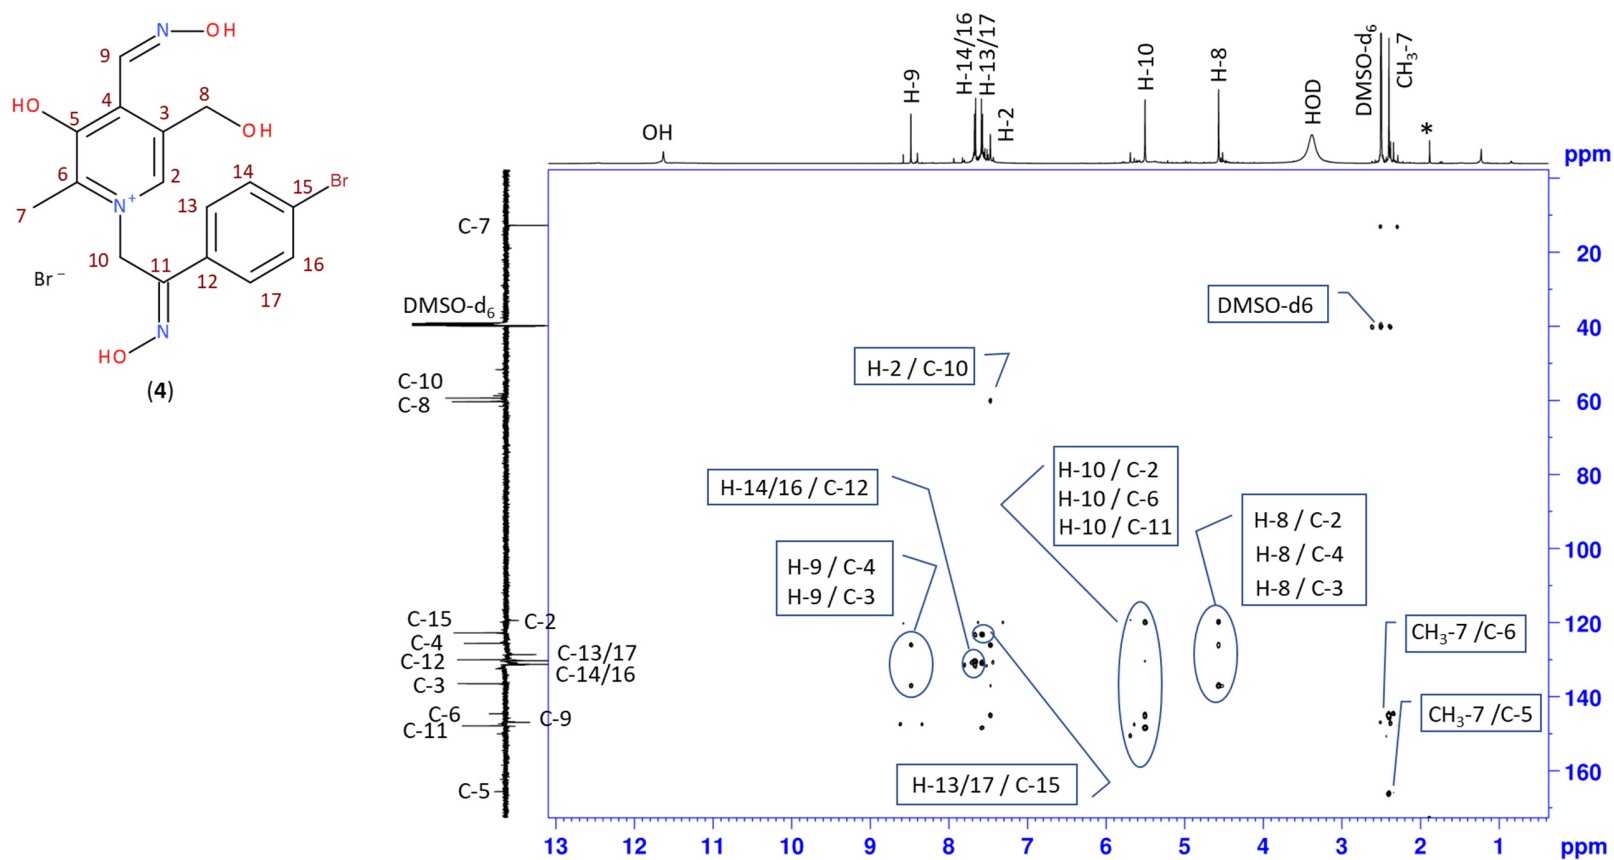

**Figure S20.** Two-dimensional H,C-correlated spectra of compound **4** recorded by HMBC method in DMSO- $d_6$ . The 600 MHz  $^1\text{H}$  spectrum is shown at the top and 125 MHz  $^{13}\text{C}$  NMR spectrum at the left-hand edge.

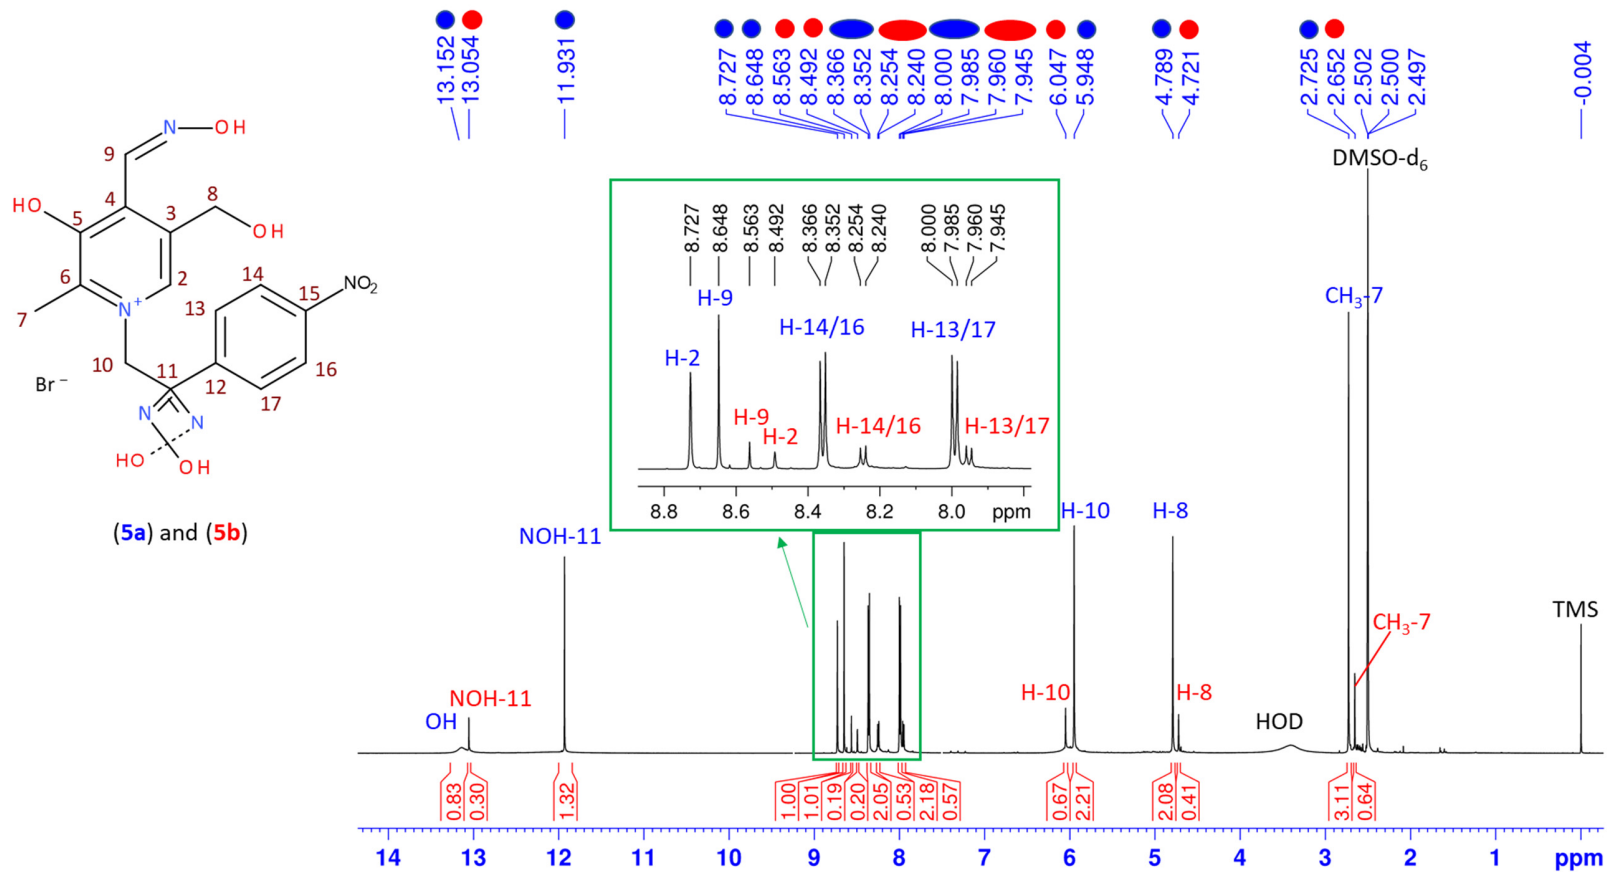

**Figure S21.** 600 MHz  $^1\text{H}$  NMR spectrum of the isomer mixture (a and b) of compound 5 in  $\text{DMSO-d}_6$ . Acetone left after synthesis is marked with an asterisk.

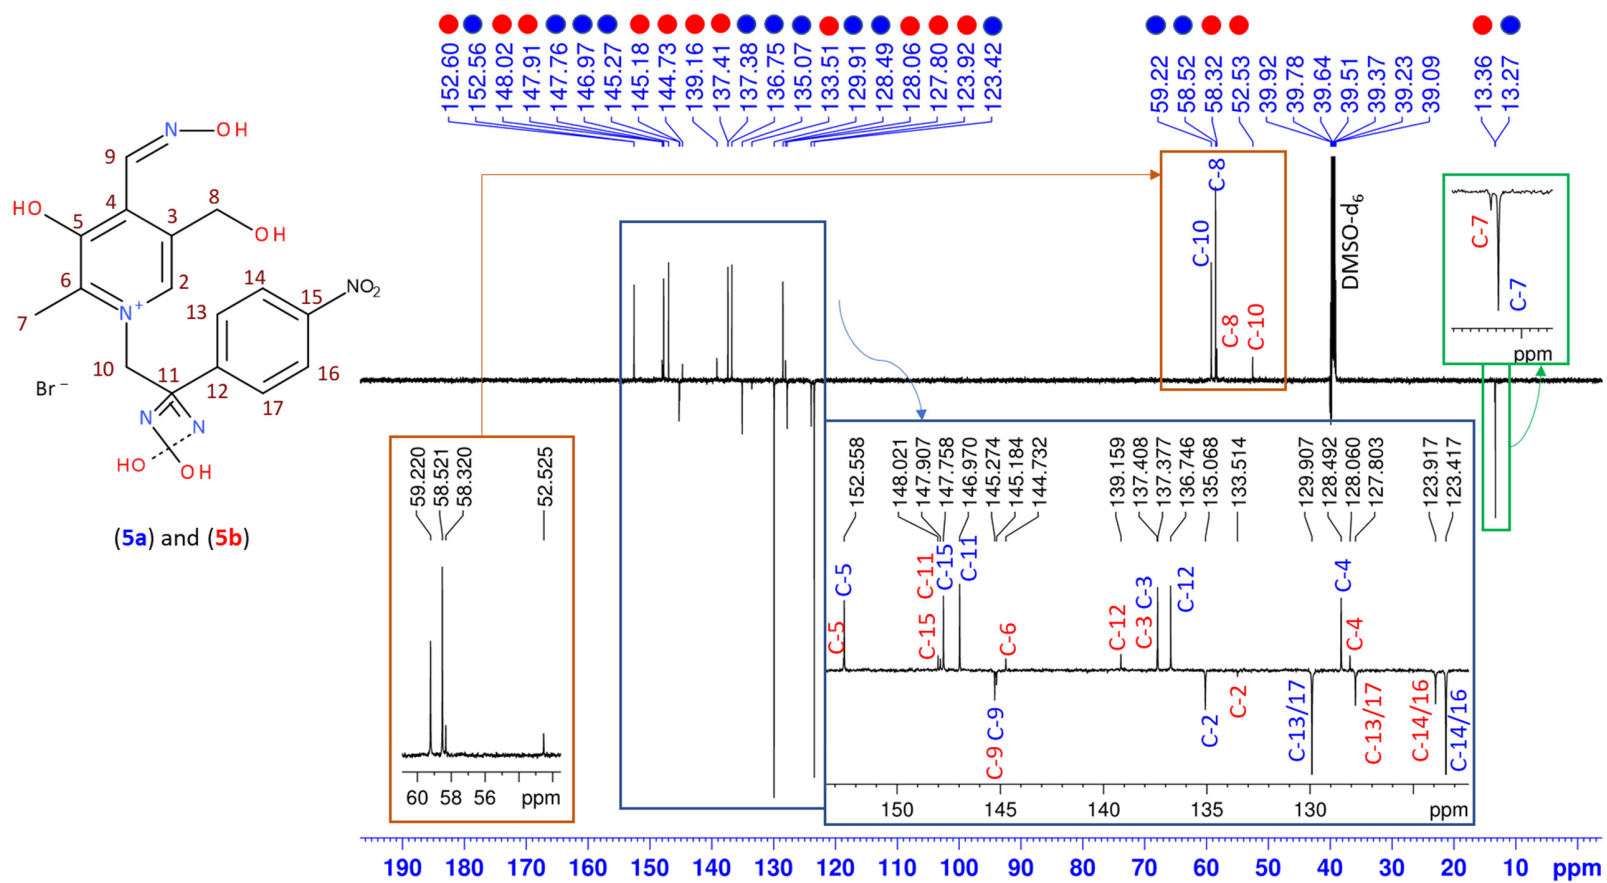

**Figure S22.** 150 MHz <sup>13</sup>C APT spectrum of the isomer mixture (a and b) of compound **5** in DMSO-d<sub>6</sub>.

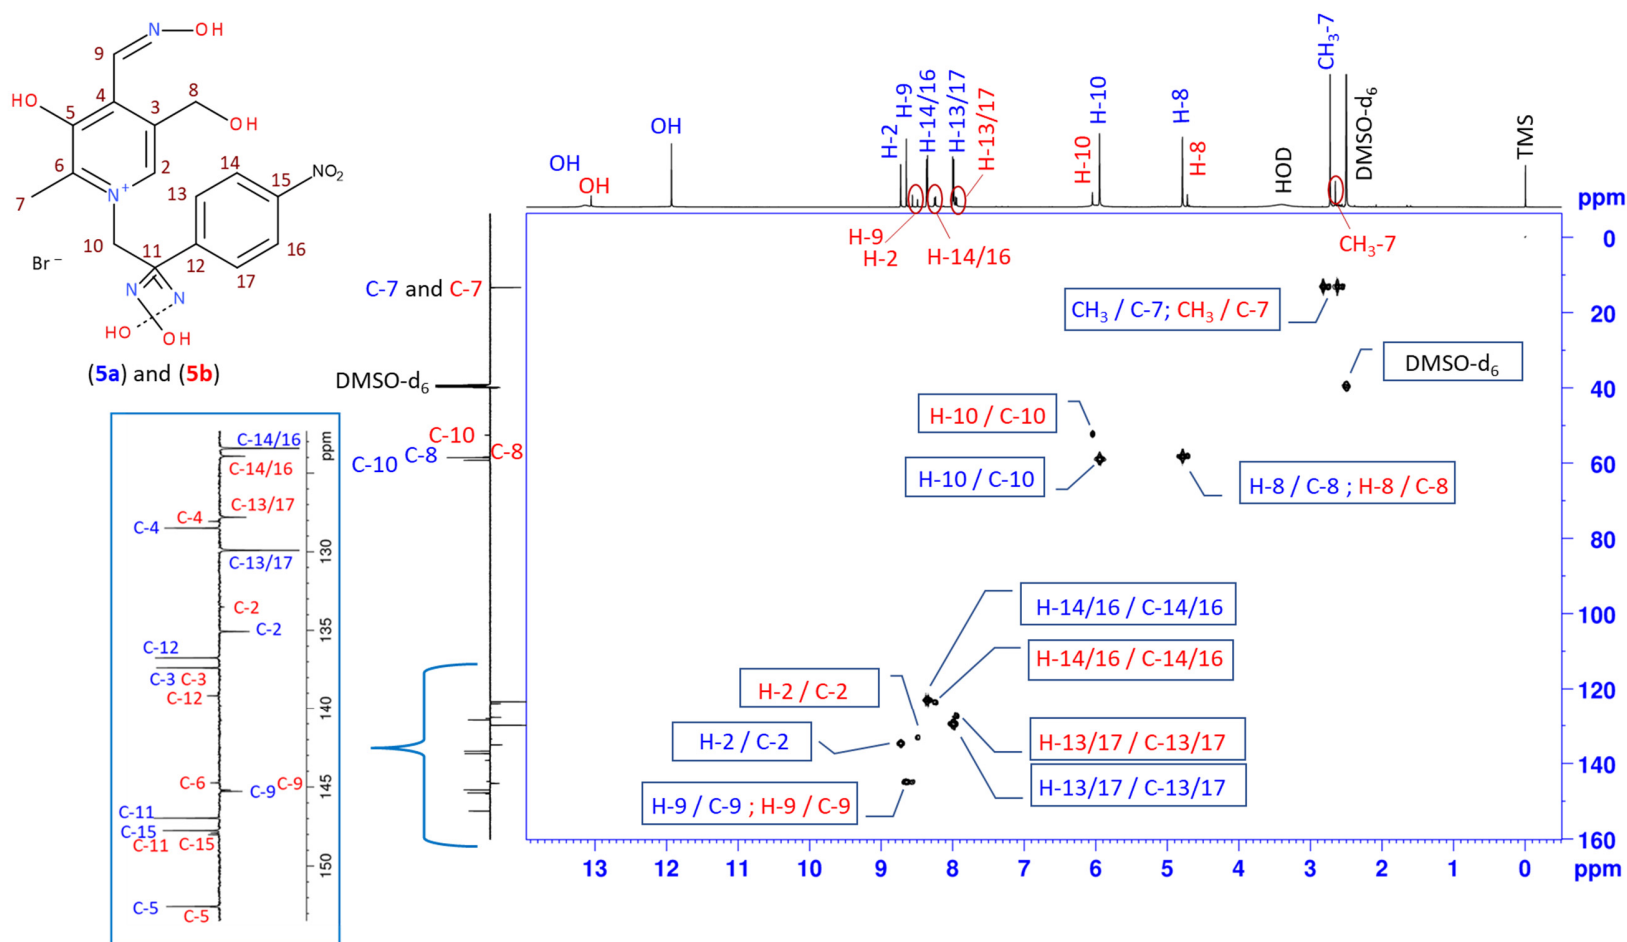

**Figure S23.** Two-dimensional H<sub>2</sub>C-correlated spectra of the isomer mixture (a and b) of compound **5** recorded by HMQC method in DMSO-d<sub>6</sub>. The 600 MHz <sup>1</sup>H spectrum is shown at the top and 125 MHz <sup>13</sup>C NMR spectrum at the left-hand edge.

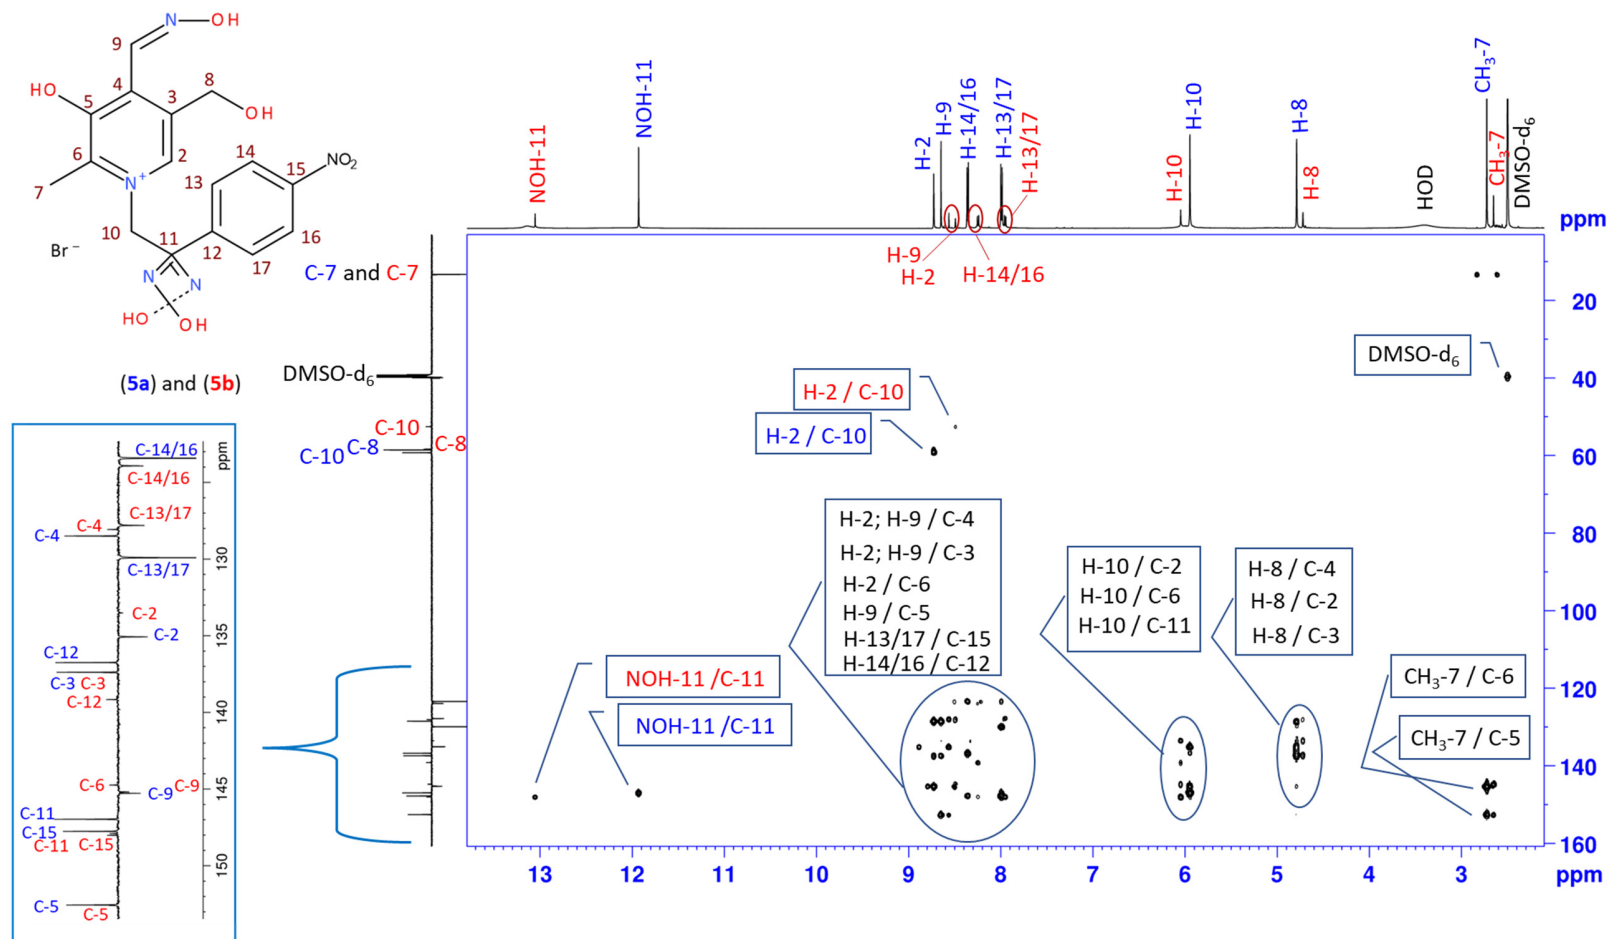

**Figure S24.** Two-dimensional H,C-correlated spectra of the isomer mixture (a and b) of compound **5** recorded by HMBC method in DMSO-d<sub>6</sub>. The 600 MHz <sup>1</sup>H spectrum is shown at the top and 125 MHz <sup>13</sup>C NMR spectrum at the left-hand edge.

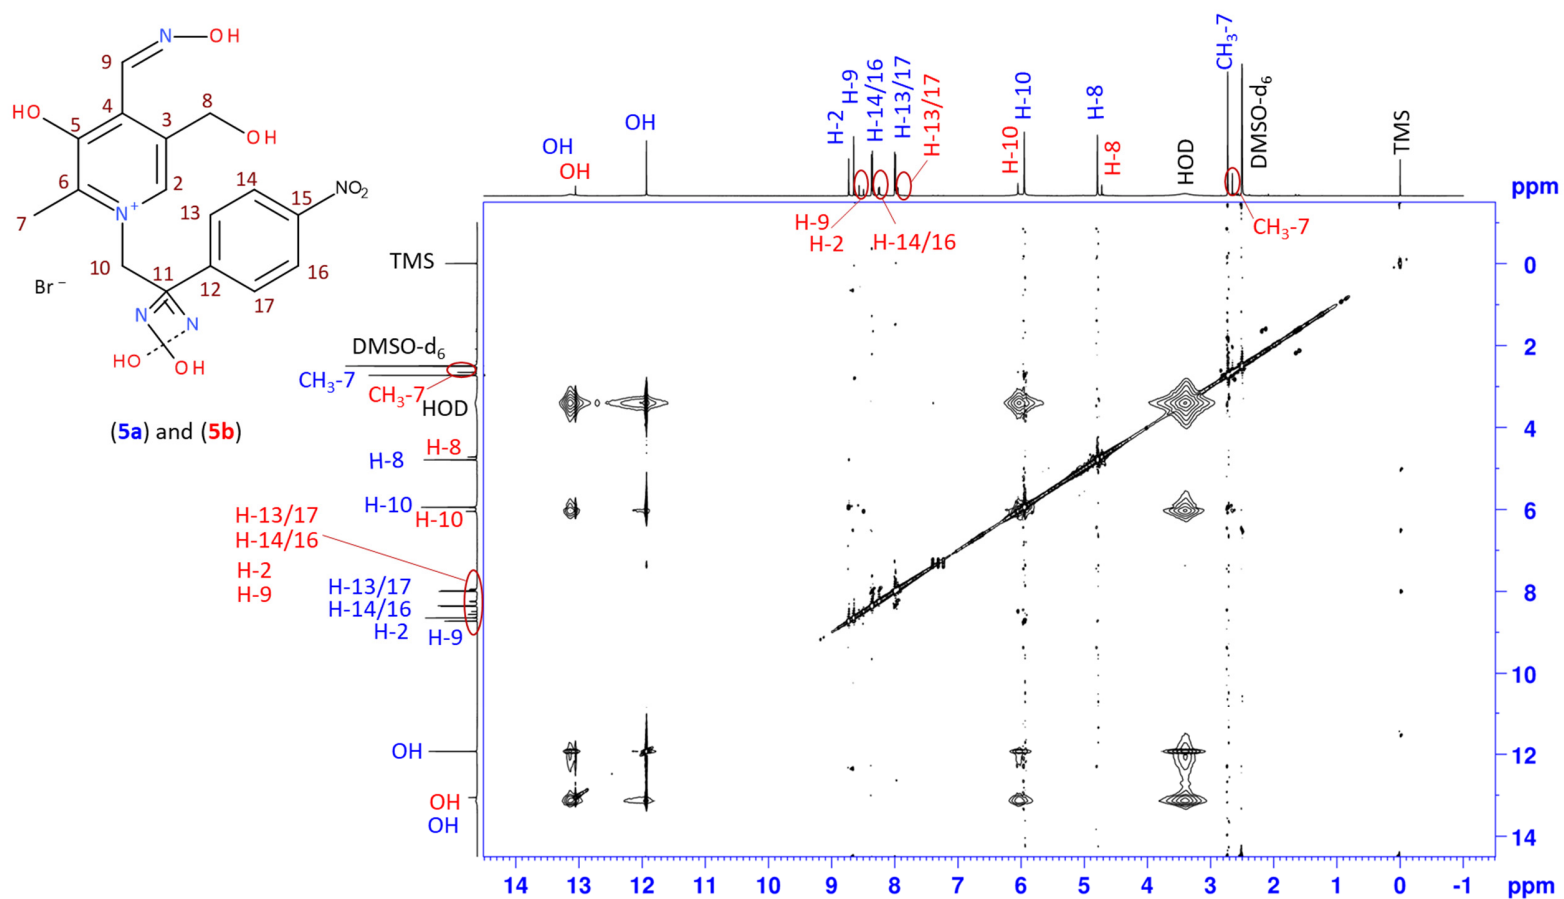

**Figure S25.** 600 MHz NOESY NMR spectrum of the isomer mixture (a and b) of compound **5** in DMSO-d<sub>6</sub>. The one-dimensional  $^1\text{H}$  spectrum is shown at the top and on the left.

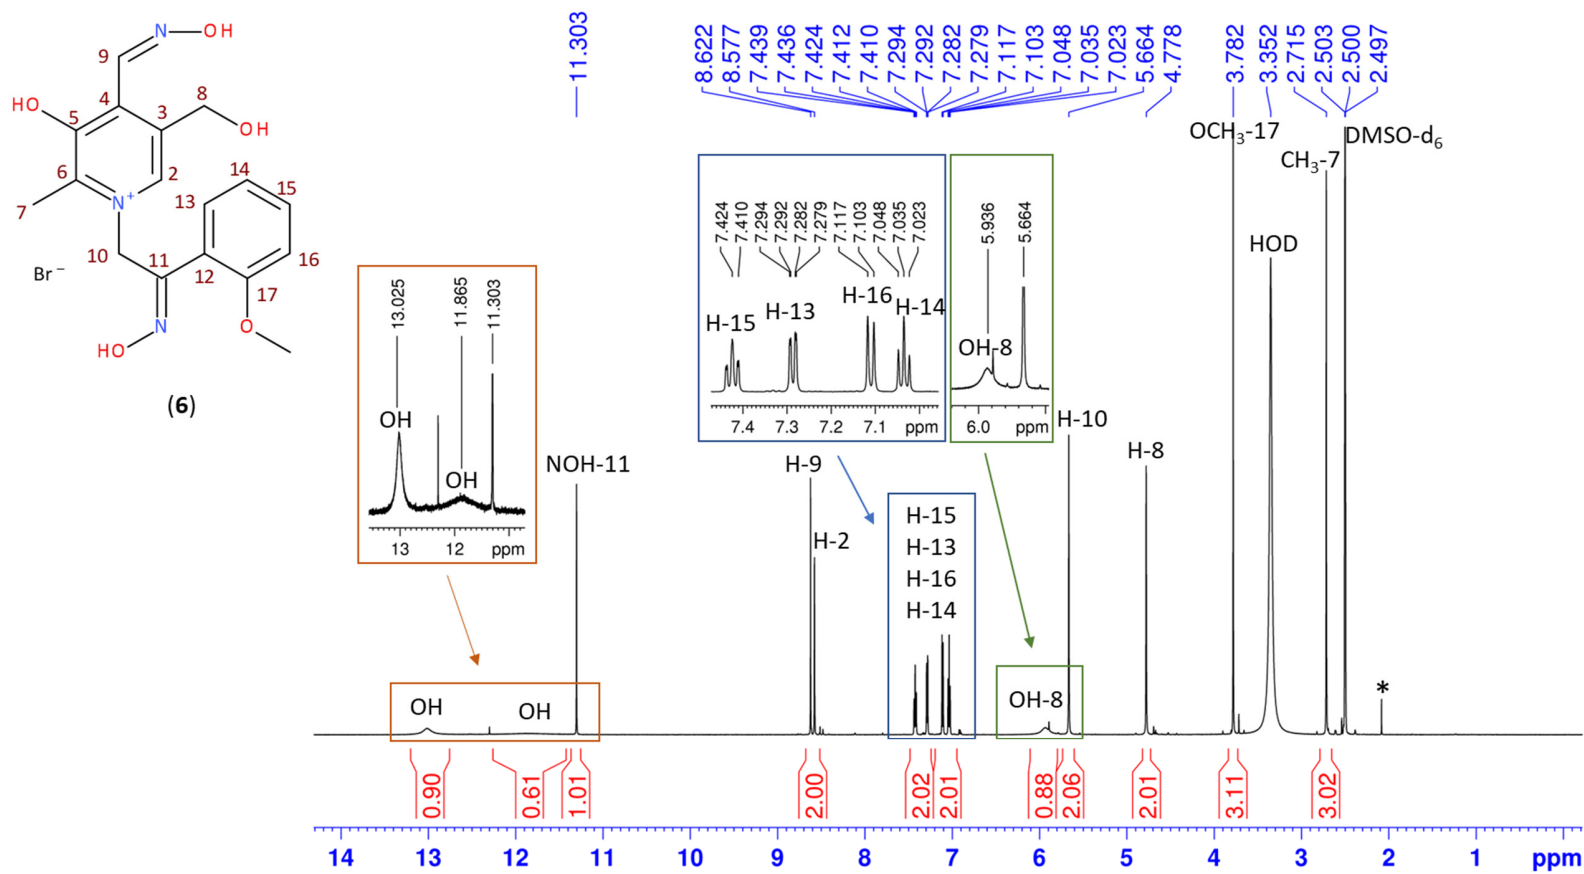

**Figure S26.** 600 MHz <sup>1</sup>H NMR spectrum of compound **6** in DMSO-d<sub>6</sub>. Acetone left after synthesis is marked with an asterisk.

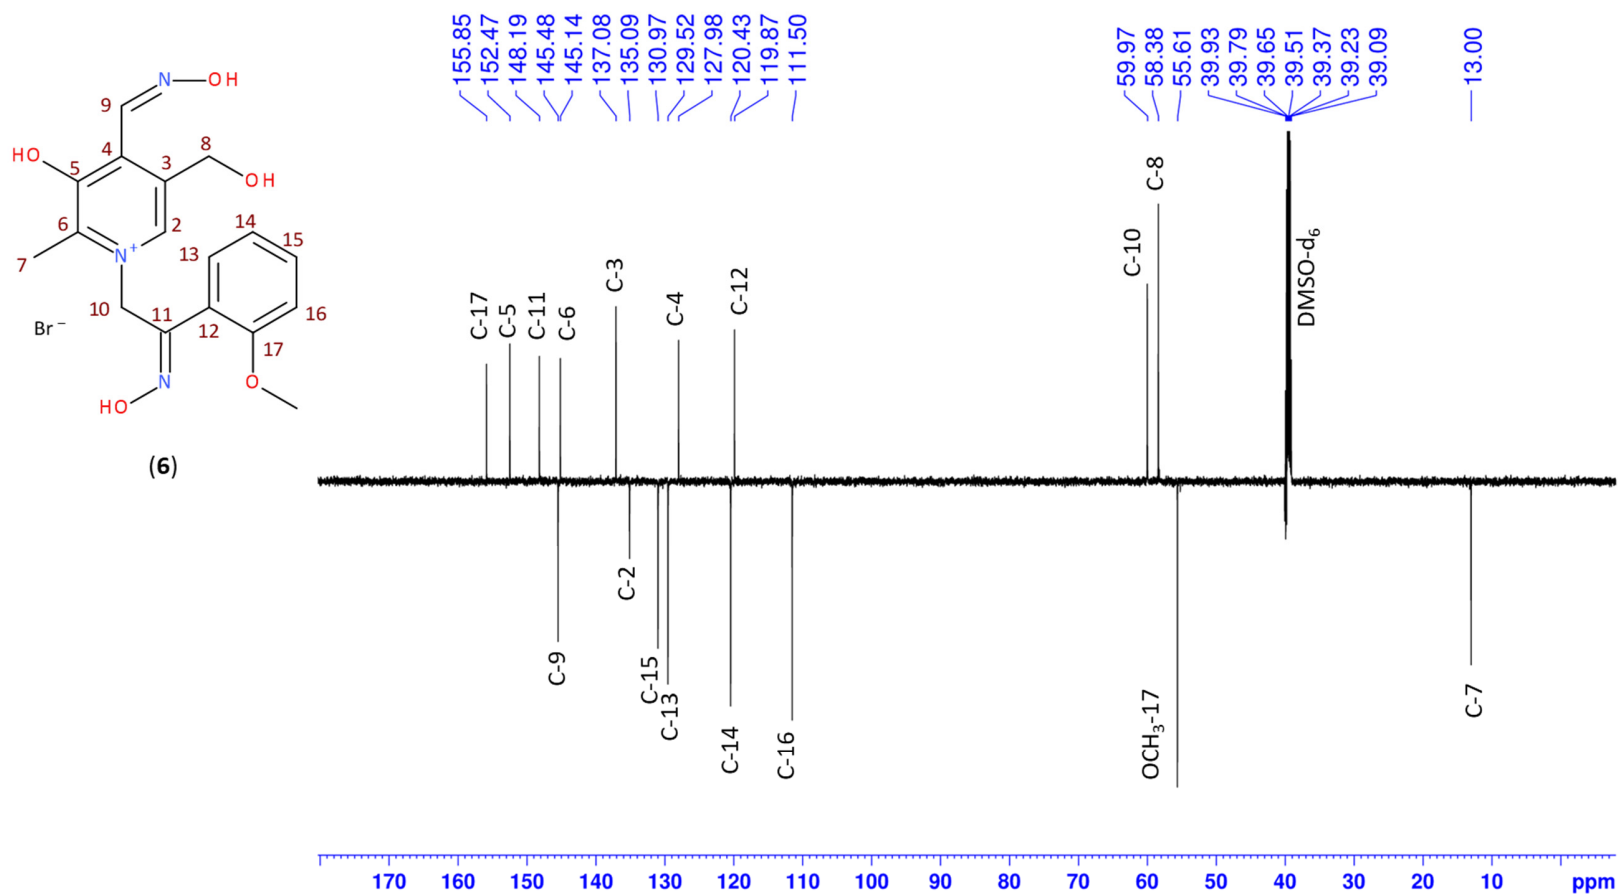

**Figure S27.** 150 MHz  $^{13}\text{C}$  APT spectrum of compound **6** in DMSO-d<sub>6</sub>.



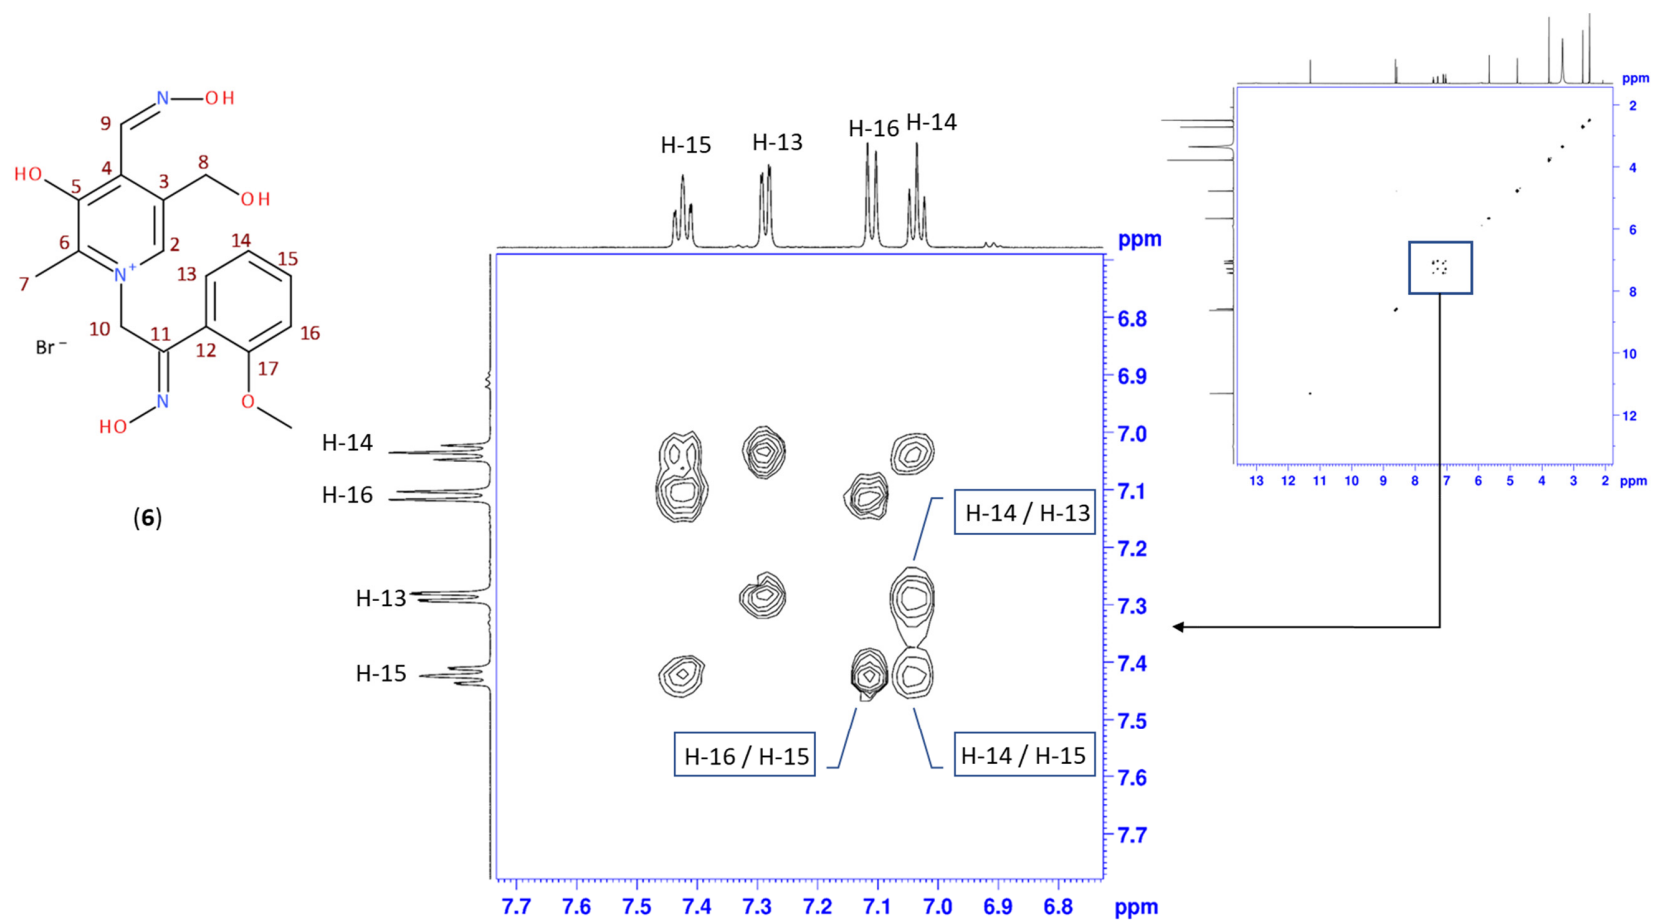

**Figure S28.** 600 MHz  $^1\text{H}$ , $^1\text{H}$ -COSY NMR spectrum of the isomer mixture (a and b) of compound **6** in  $\text{DMSO-d}_6$ . The one-dimensional  $^1\text{H}$  spectrum is shown at the top and on the left.



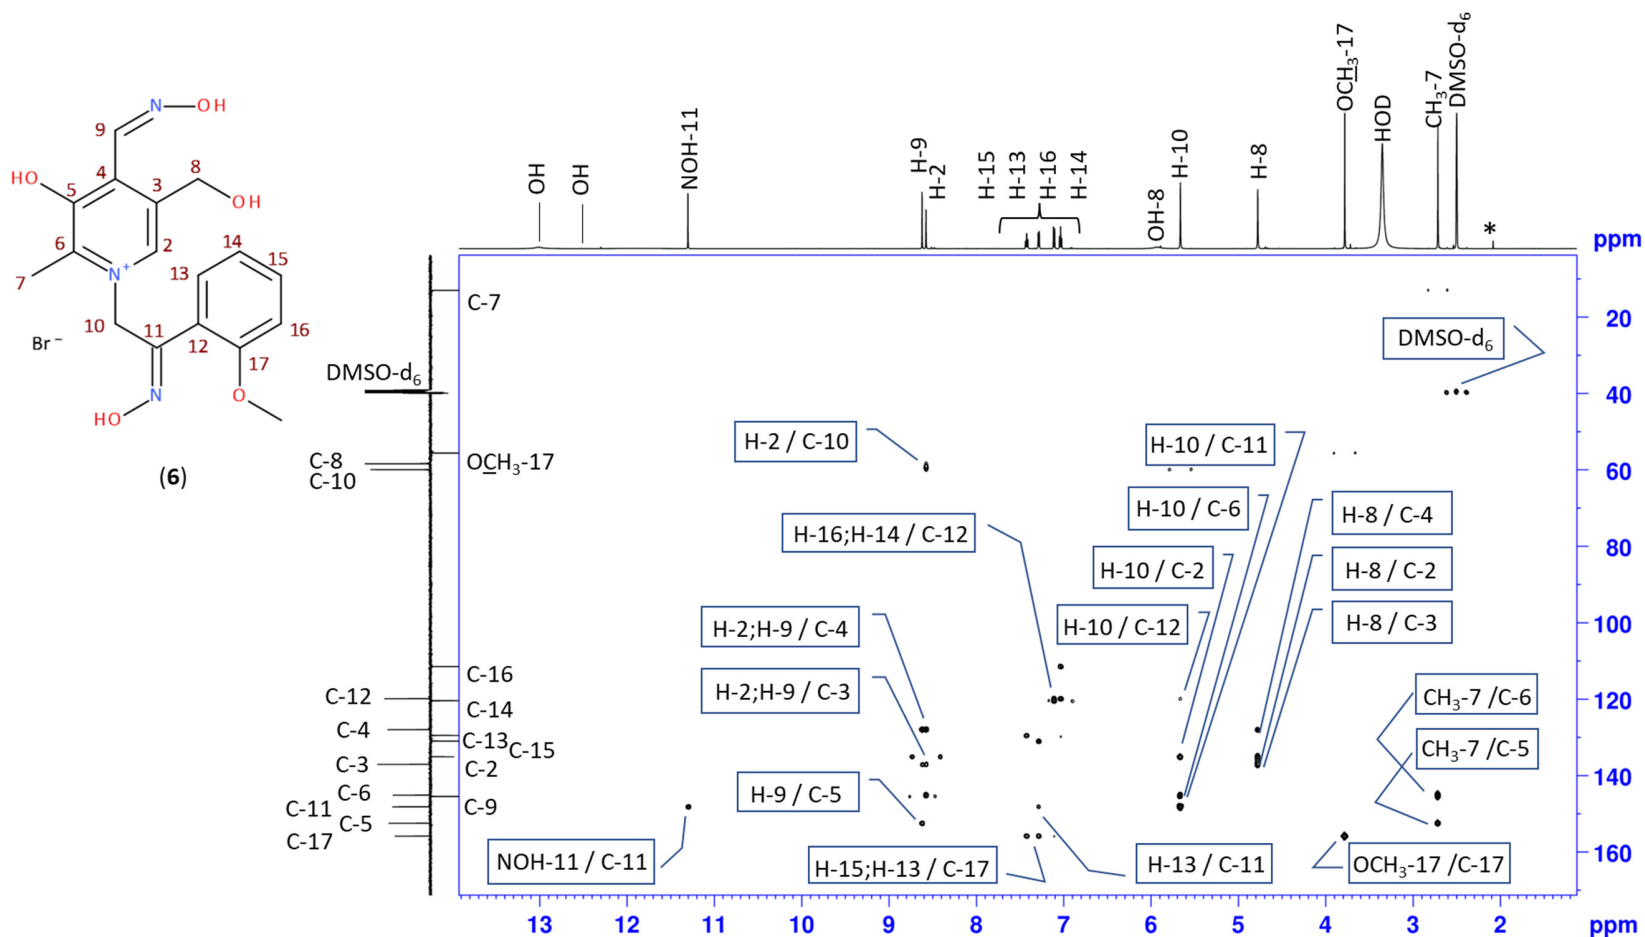

**Figure S30.** Two-dimensional H,C-correlated spectra of the isomer mixture (a and b) of compound **6** recorded by HMBC method in DMSO- $\text{d}_6$ . The 600 MHz  $^1\text{H}$  spectrum is shown at the top and 125 MHz  $^{13}\text{C}$  NMR spectrum at the left-hand edge.

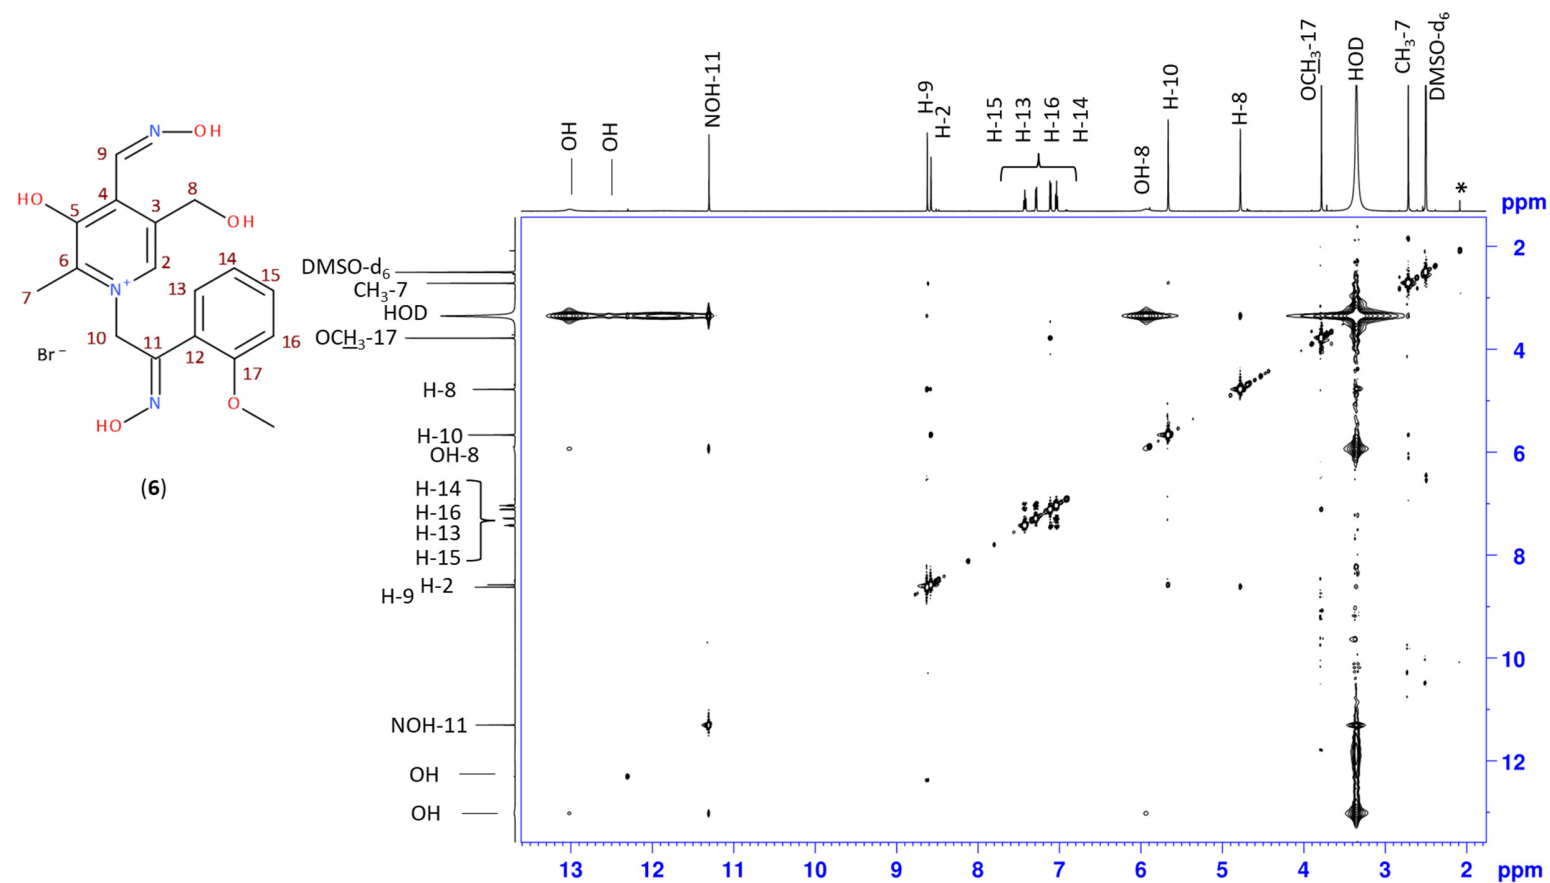

**Figure S31.** 600 MHz NOESY NMR spectrum of the isomer mixture (a and b) of compound **6** in DMSO-d<sub>6</sub>. The one-dimensional <sup>1</sup>H spectrum is shown at the top and on the left.

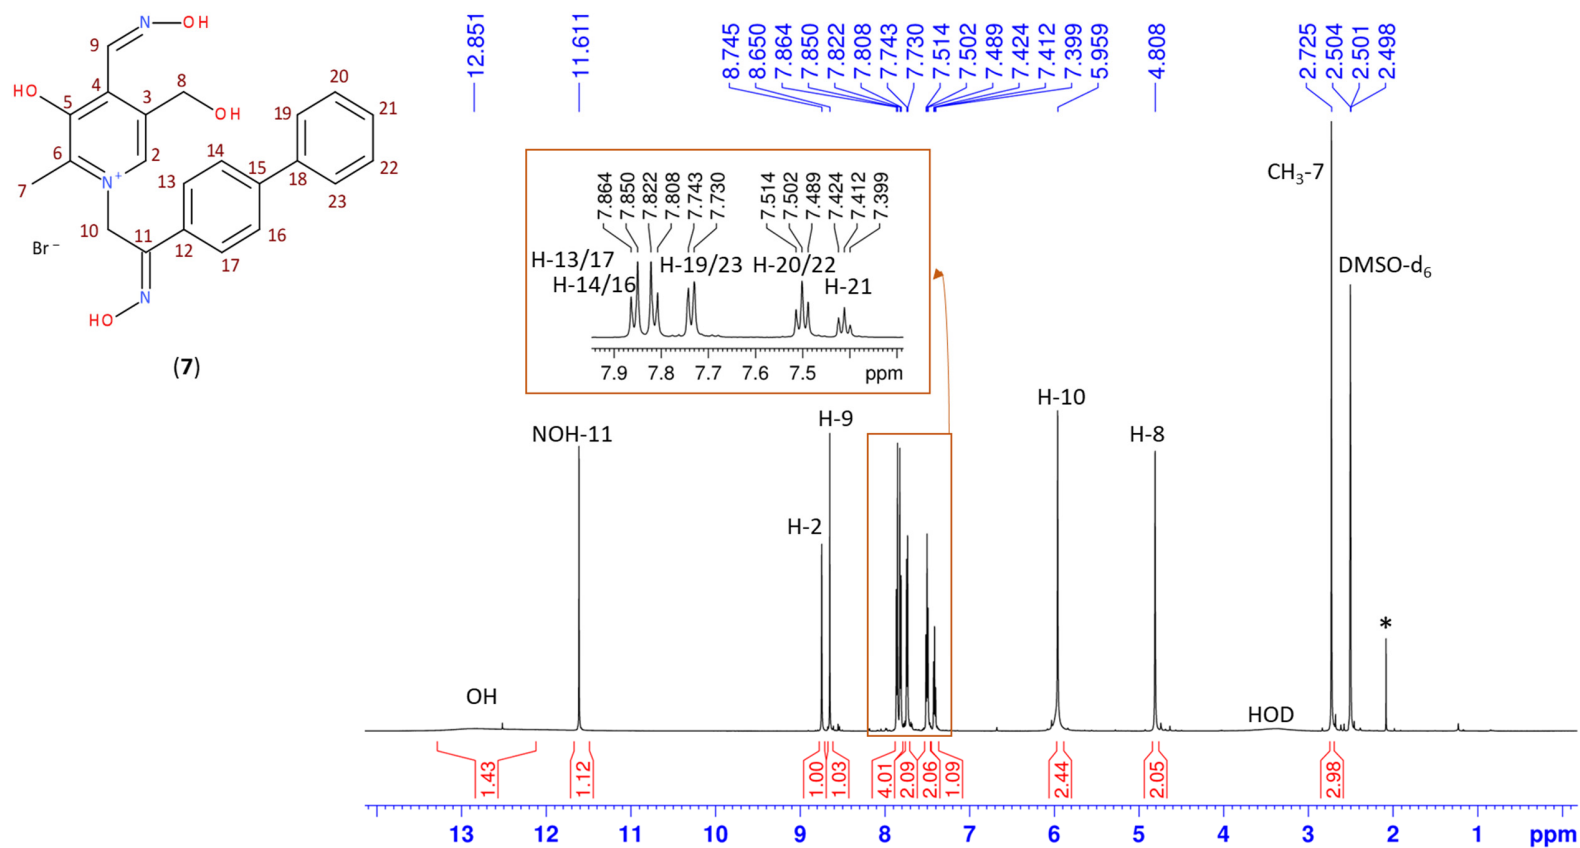

**Figure S32.** 600 MHz  $^1\text{H}$  NMR spectrum of compound **7** in  $\text{DMSO-d}_6$ . Acetone left after synthesis is marked with an asterisk.

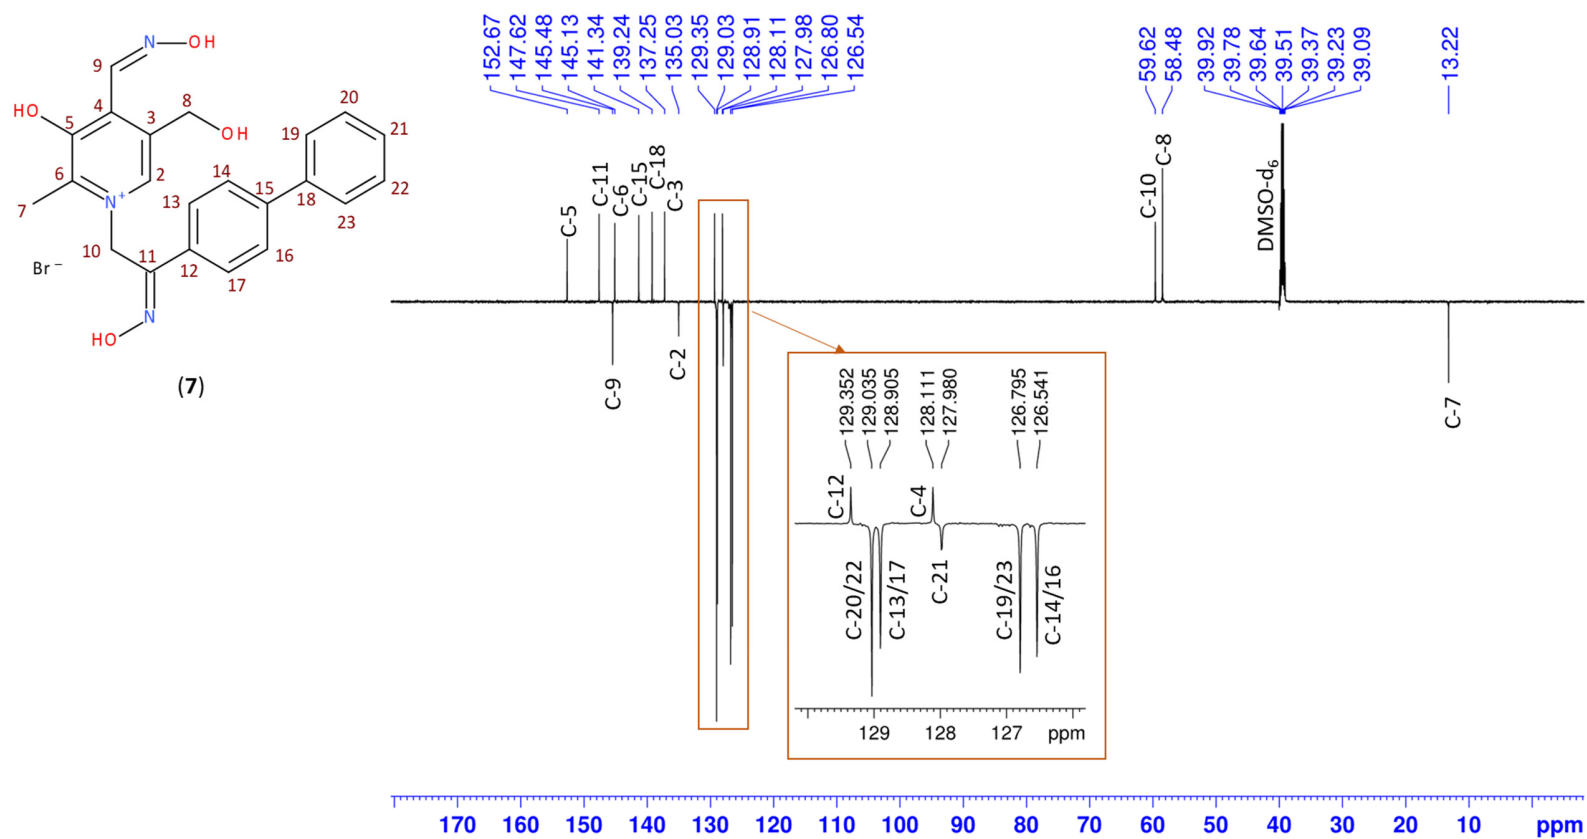

**Figure S33.** 150 MHz <sup>13</sup>C APT spectrum of compound **7** in DMSO-d<sub>6</sub>.

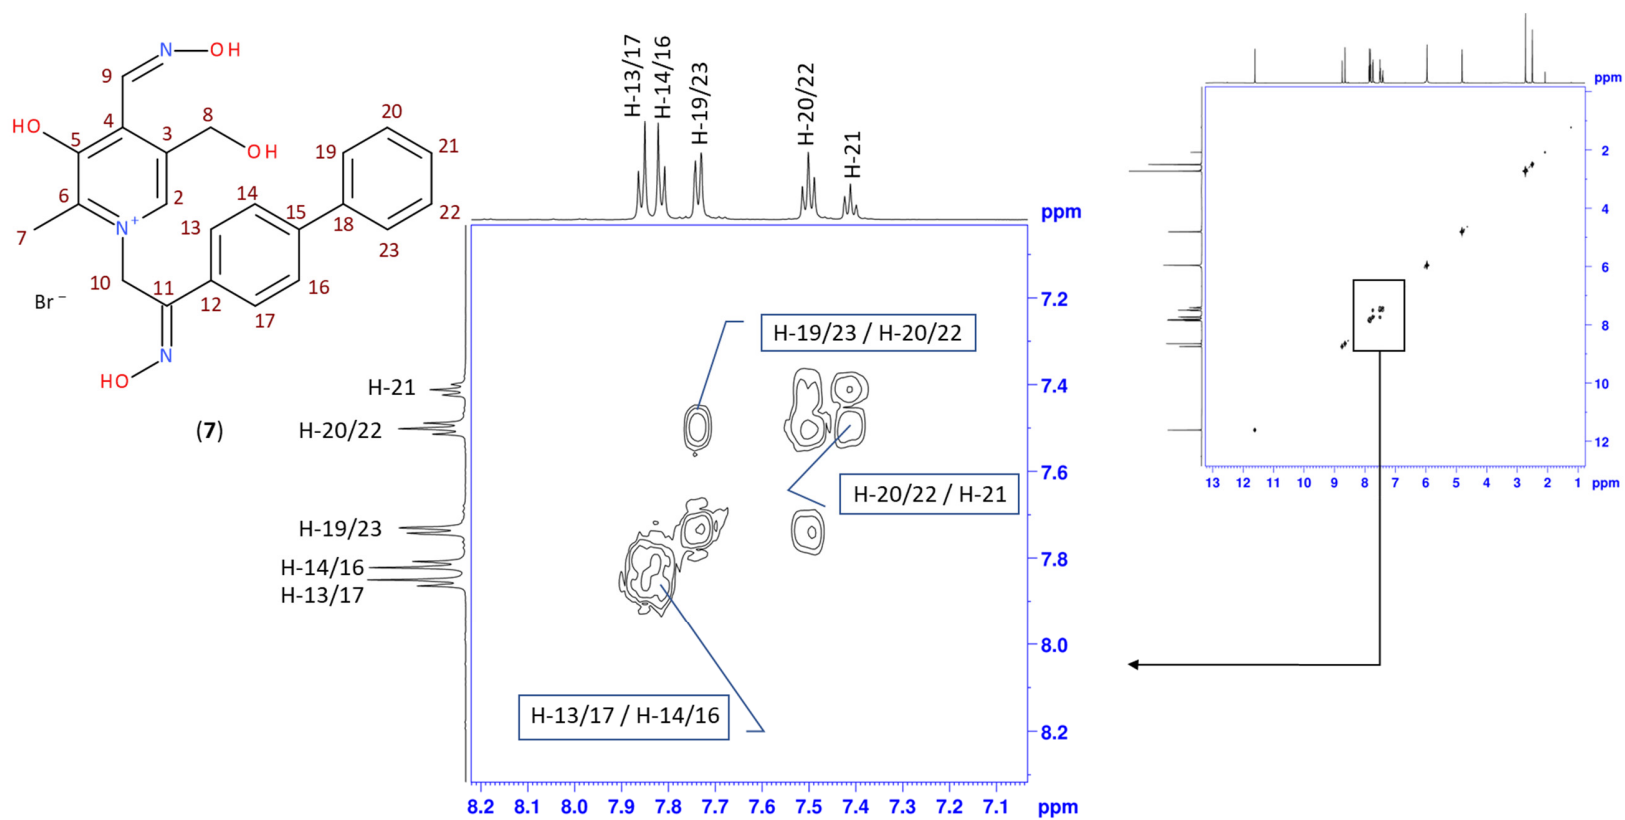

**Figure S34.** 600 MHz  $^1\text{H}$ , $^1\text{H}$ -COSY NMR spectrum of the isomer mixture (a and b) of compound **7** in  $\text{DMSO-d}_6$ . The one-dimensional  $^1\text{H}$  spectrum is shown at the top and on the left.

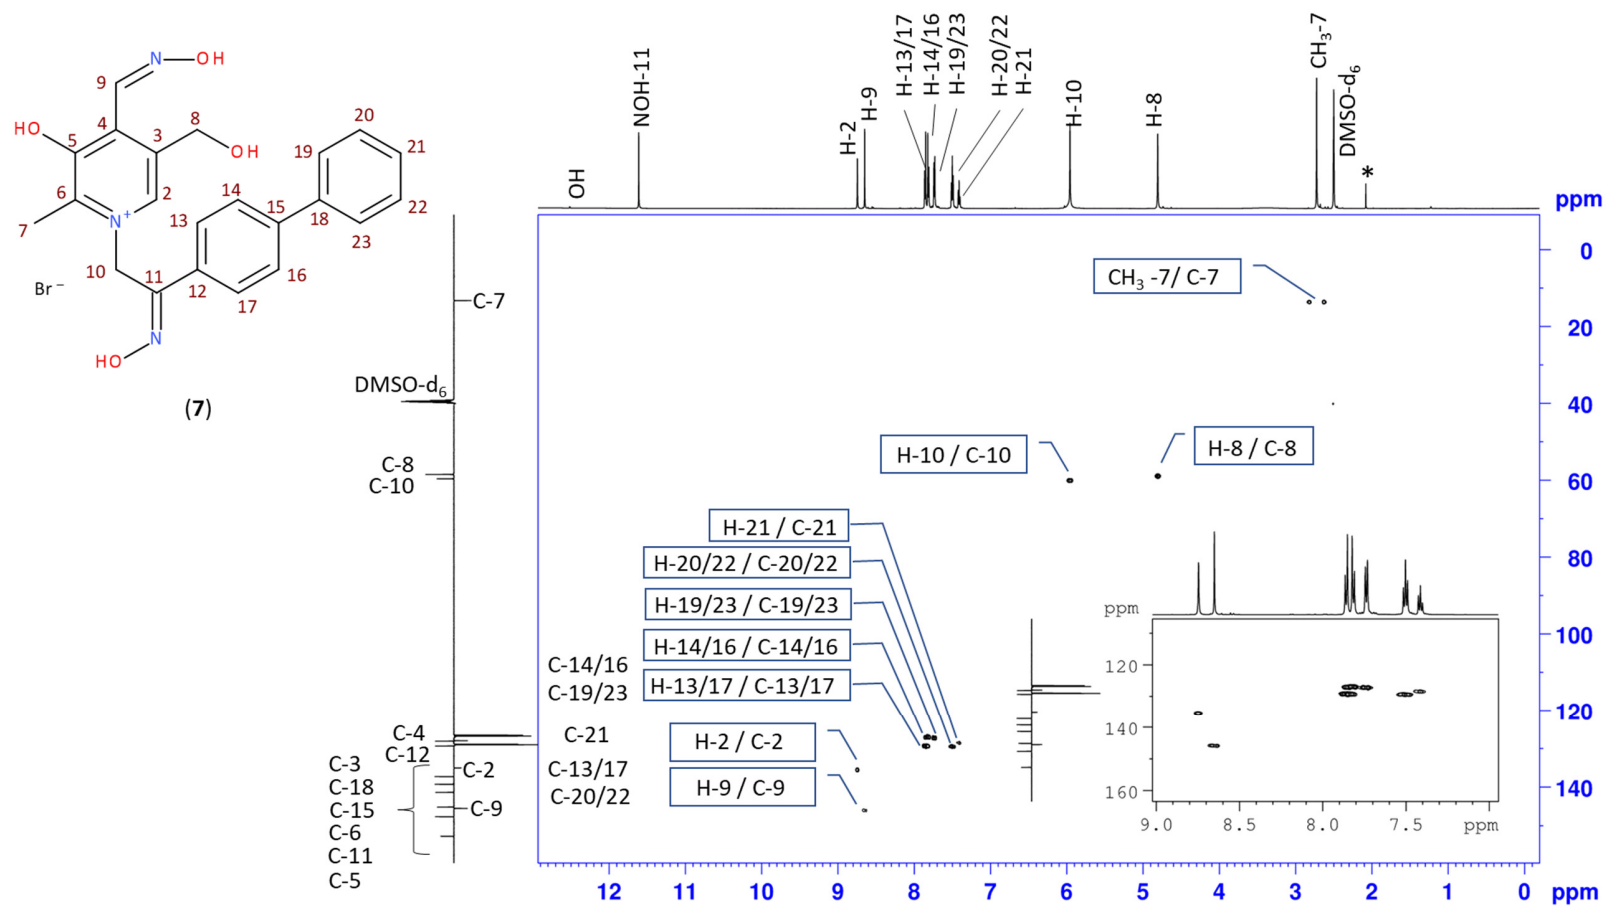

**Figure S35.** Two-dimensional H,C-correlated spectra of compound **7** recorded by HMQC method in DMSO- $\text{d}_6$ . The 600 MHz  $^1\text{H}$  spectrum is shown at the top and 125 MHz  $^{13}\text{C}$  NMR spectrum at the left-hand edge.



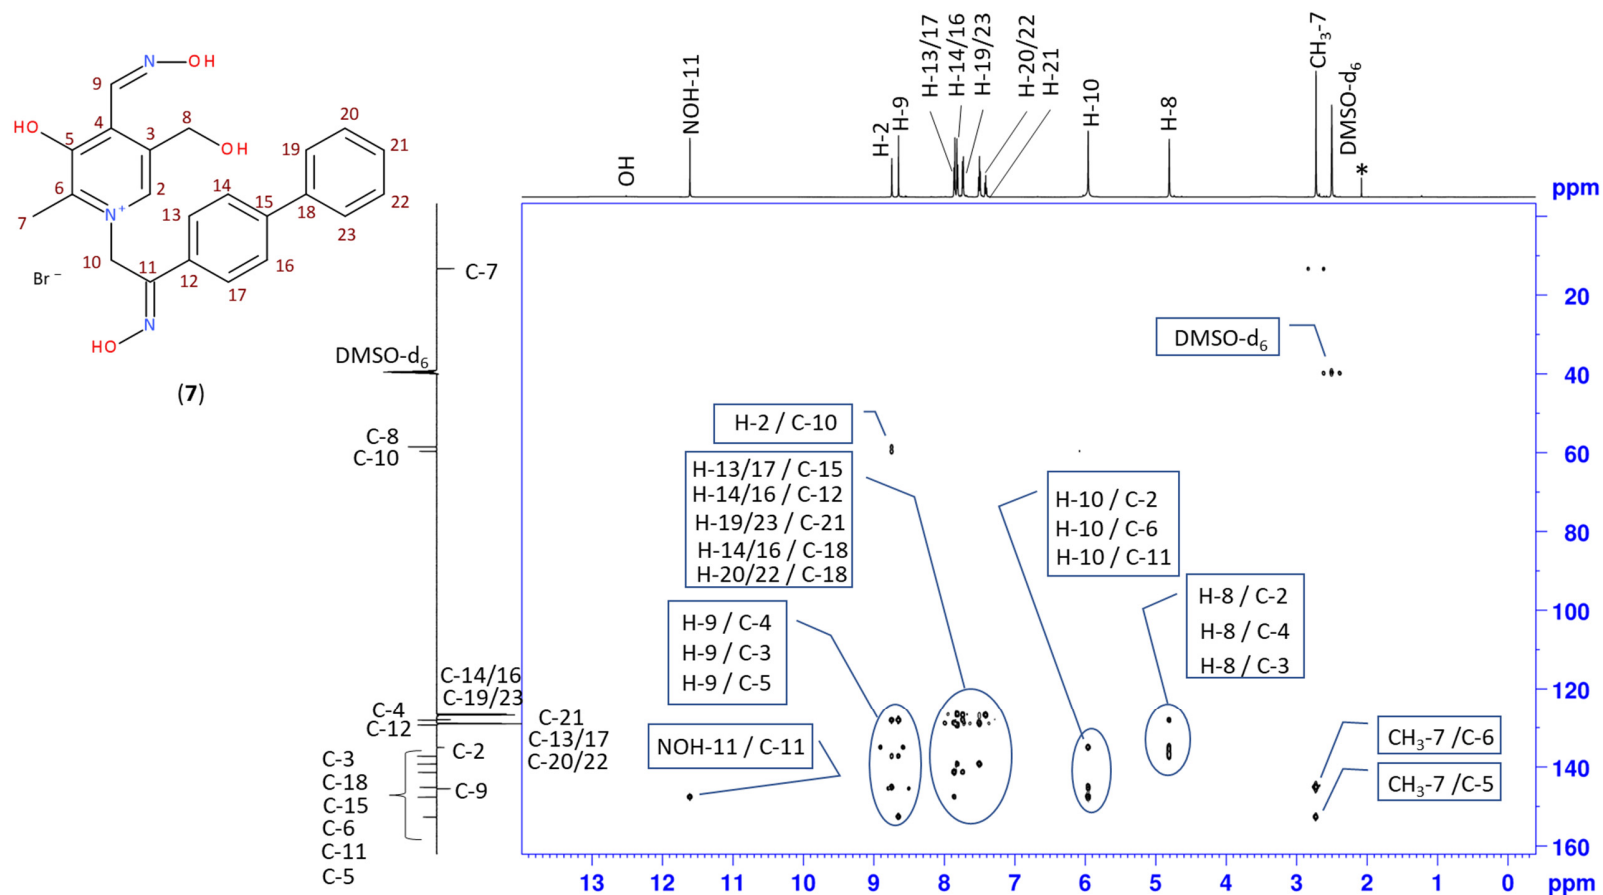

**Figure S36.** Two-dimensional H,C-correlated spectra of compound **7** recorded by HMBC method in DMSO-d<sub>6</sub>. The 600 MHz <sup>1</sup>H spectrum is shown at the top and 125 MHz <sup>13</sup>C NMR spectrum at the left-hand edge.

## MS spectra of prepared compounds (1 – 7)

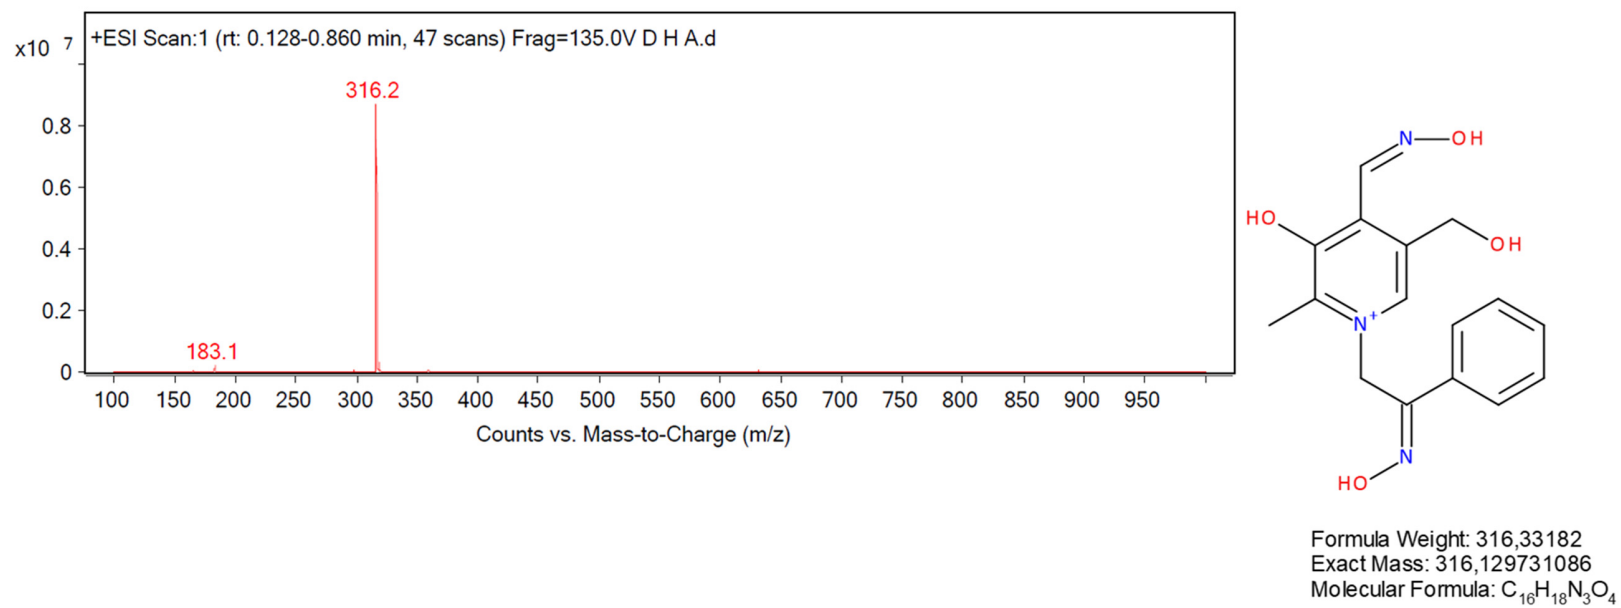

Figure S37. Mass spectrum (ESI<sup>+</sup>) of compound 1.

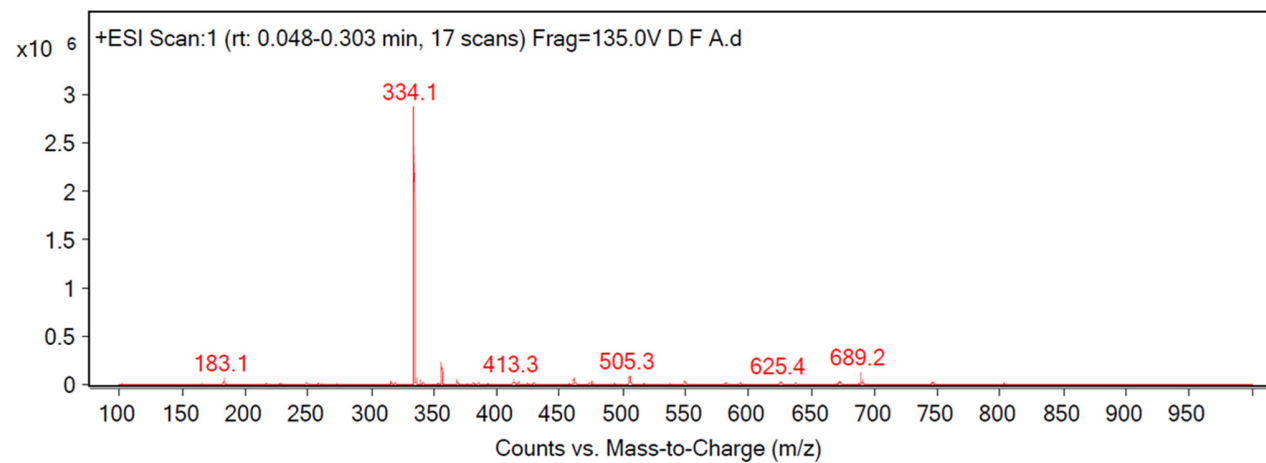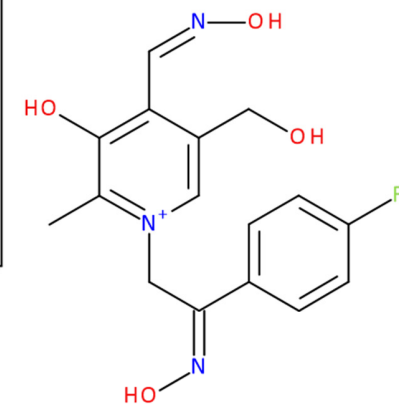

Formula Weight: 334,32228  
 Exact Mass: 334,120309254  
 Molecular Formula: C<sub>16</sub>H<sub>17</sub>FN<sub>3</sub>O<sub>4</sub>

Figure S38. Mass spectrum (ESI<sup>+</sup>) of compound 2.

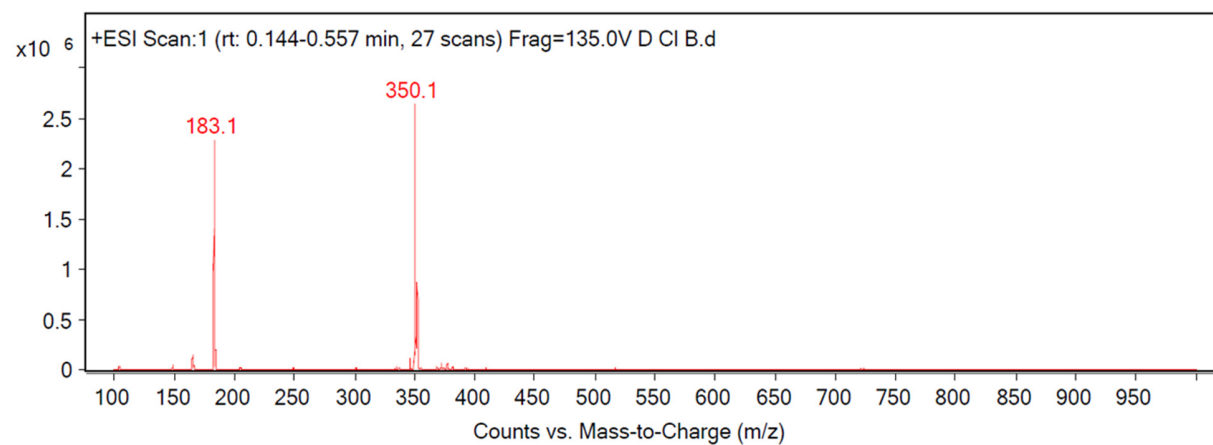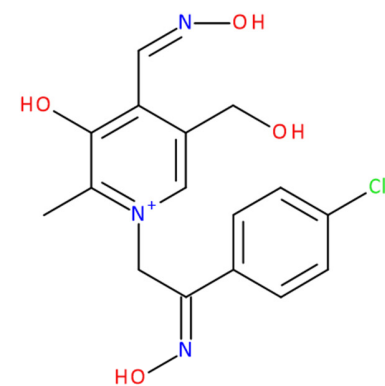

Formula Weight: 350,77687  
 Exact Mass: 350,090758764  
 Molecular Formula: C<sub>16</sub>H<sub>17</sub>ClN<sub>3</sub>O<sub>4</sub>

Figure S39. Mass spectrum (ESI<sup>+</sup>) of compound **3**.

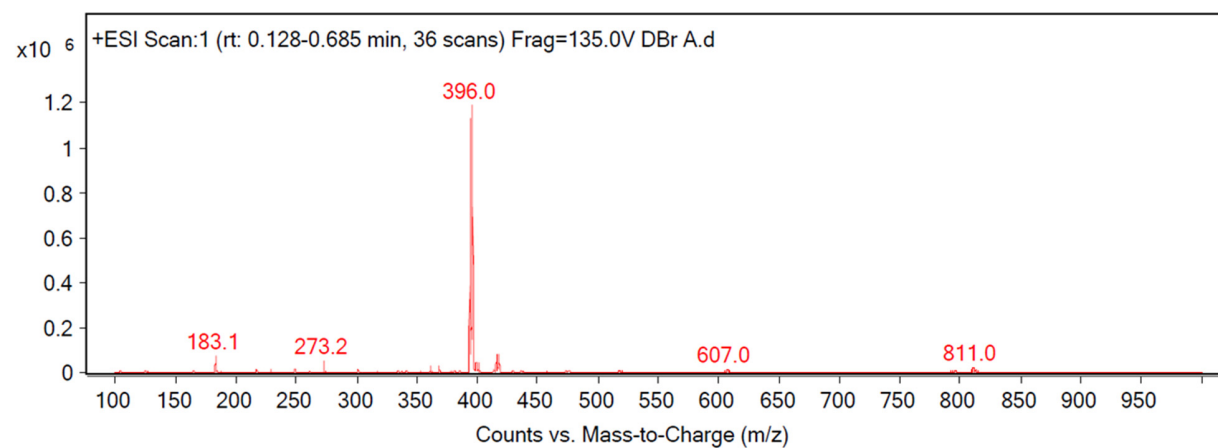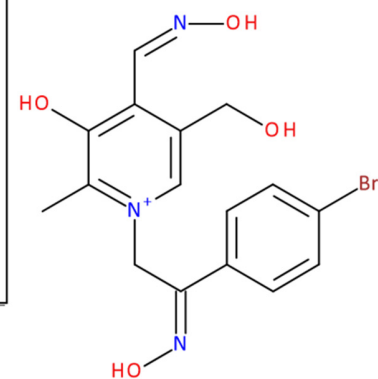

Formula Weight: 395,22787  
 Exact Mass: 394,040243654  
 Molecular Formula: C<sub>16</sub>H<sub>17</sub>BrN<sub>3</sub>O<sub>4</sub>

Figure S40. Mass spectrum (ESI<sup>+</sup>) of compound **4**.

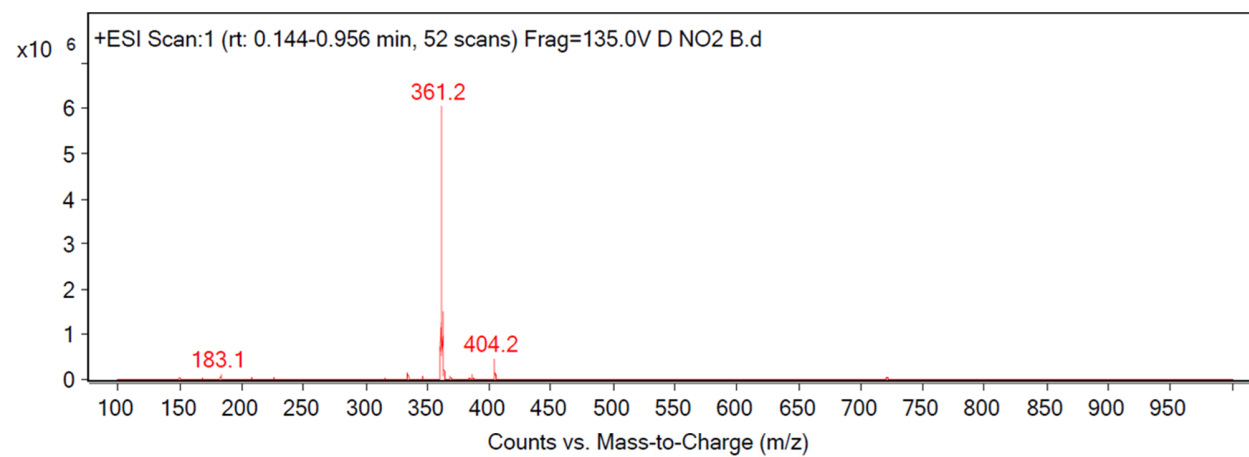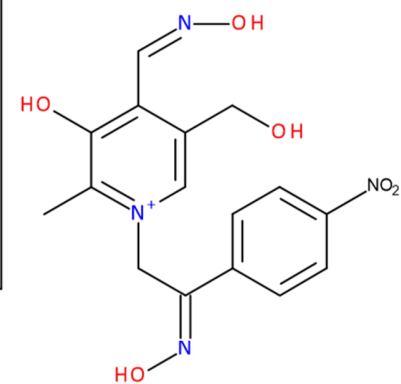

Formula Weight: 361,32938  
 Exact Mass: 361,114809304  
 Molecular Formula: C<sub>16</sub>H<sub>17</sub>N<sub>4</sub>O<sub>6</sub>

Figure S41. Mass spectrum (ESI<sup>+</sup>) of compound **5**.

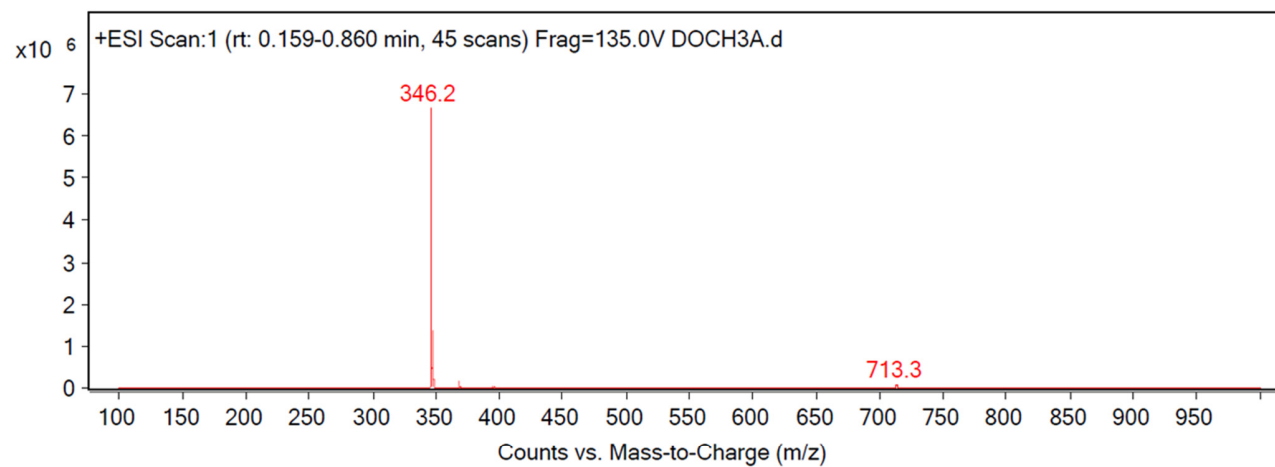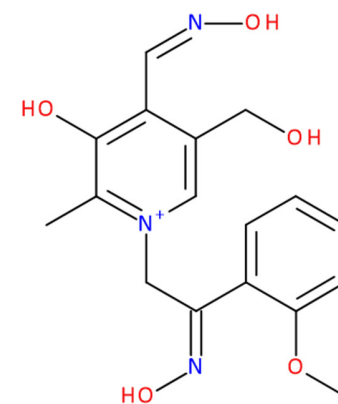

Formula Weight: 346,3578  
 Exact Mass: 346,14029577  
 Molecular Formula: C<sub>17</sub>H<sub>20</sub>N<sub>3</sub>O<sub>5</sub>

**Figure S42.** Mass spectrum (ESI<sup>+</sup>) of compound **6**.

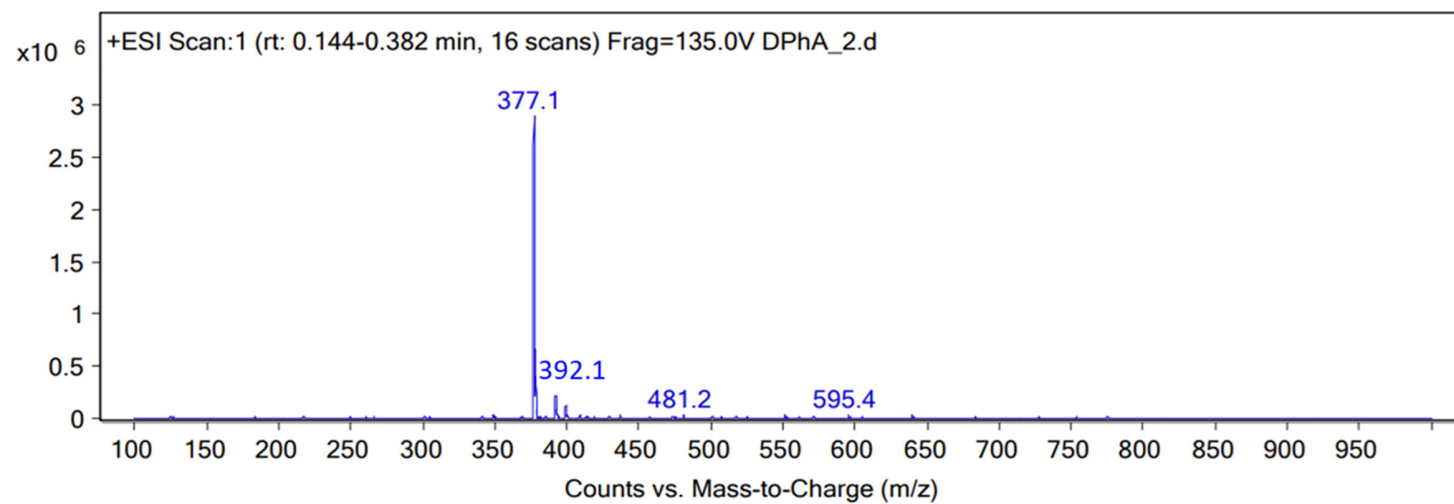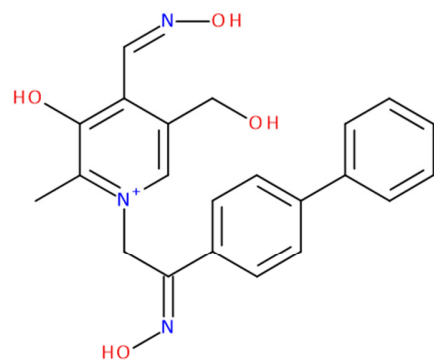

Formula Weight: 392,42778  
 Exact Mass: 392,161031214  
 Molecular Formula: C<sub>22</sub>H<sub>22</sub>N<sub>3</sub>O<sub>4</sub>

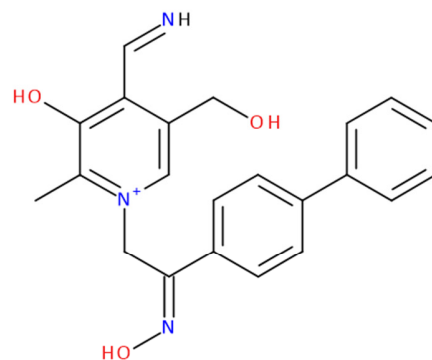

Formula Weight: 376,42838  
 Exact Mass: 376,166116594  
 Molecular Formula: C<sub>22</sub>H<sub>22</sub>N<sub>3</sub>O<sub>3</sub>

**Figure S43** Mass spectrum (ESI<sup>+</sup>) of compound **7**.



## Interactions between compound 1 and AChE, and compound 7 and AChE / BChE

**Table S1.** Interactions between compound **1** and AChE.

| Amino acid | Non-bonding interactions                                              |
|------------|-----------------------------------------------------------------------|
| HOH869     | N12, hydrogen bond-water hydrogen bond;<br>conventional hydrogen bond |
| HOH869     | H26, hydrogen bond-water hydrogen bond;<br>conventional hydrogen bond |
| HOH809     | H30, hydrogen bond-water hydrogen bond; carbon<br>hydrogen bond       |
| Gly122     | O23, hydrogen bond-conventional hydrogen bond                         |
| Tyr124     | N12, hydrogen bond-conventional hydrogen bond                         |
| Asp74      | H26, hydrogen bond-conventional hydrogen bond                         |
| Tyr124     | H32, hydrogen bond-conventional hydrogen bond                         |
| Gly121     | O23, hydrogen bond-carbon hydrogen bond                               |
| Asp74      | H25, hydrogen bond-carbon hydrogen bond                               |
| Tyr341     | B8, hydrophobic- $\pi$ - $\pi$ stacked                                |

**Table S2.** Interactions between compound **7** and AChE.

| Amino acid | Non-bonding interactions                        |
|------------|-------------------------------------------------|
| Gly122     | O25, hydrogen bond-conventional hydrogen bond   |
| Ser203     | H32, hydrogen bond-conventional hydrogen bond   |
| His447     | H38, hydrogen bond-conventional hydrogen bond   |
| Gly121     | O13, hydrogen bond-carbon hydrogen bond         |
| Glu202     | H31, hydrogen bond-carbon hydrogen bond         |
| His447     | H31, hydrogen bond-carbon hydrogen bond         |
| Phe338     | H46 , hydrogen bond- $\pi$ -donor hydrogen bond |
| Tyr124     | B8, other- $\pi$ -lone pair                     |
| Tyr72      | B8, hydrophobic- $\pi$ - $\pi$ stacked          |
| Tyr337     | B7, hydrophobic- $\pi$ - $\pi$ T-shaped         |

**Table S3.** Interactions between compound **7** and BChE.

| Amino acid | Non-bonding interactions                                              |
|------------|-----------------------------------------------------------------------|
| Asp70      | N3, electrostatic-attractive charge                                   |
| HOH736     | N16, hydrogen bond-water hydrogen bond;<br>conventional hydrogen bond |
| HOH910     | N16, hydrogen bond-water hydrogen bond;<br>conventional hydrogen bond |
| HOH930     | O11, hydrogen bond-water hydrogen bond;<br>conventional hydrogen bond |
| Gln119     | O8, hydrogen bond-conventional hydrogen bond                          |
| Thr284     | H39, hydrogen bond-conventional hydrogen bond                         |
| HOH930     | B8, other- $\pi$ -lone pair                                           |
| Trp82      | B8, hydrophobic- $\pi$ - $\pi$ stacked                                |
| Trp82      | B8, hydrophobic- $\pi$ - $\pi$ stacked                                |
| Trp82      | B8, hydrophobic- $\pi$ - $\pi$ T-shaped                               |
